1 **Epigenetic regulation underlying *Plasmodium berghei* gene expression during**  
2 **its developmental transition from host to vector**

3

4

5 Kathrin Witmer<sup>1\*</sup>, Sabine AK Fraschka<sup>2</sup>, Dina Vlachou<sup>1</sup>, Richárd Bártfai<sup>2</sup>, George K Christophides<sup>1\*</sup>

6

7 <sup>1</sup>Department of Life Sciences, Imperial College London, SW7 2AZ, London, UK

8 <sup>2</sup>Department of Molecular Biology, Radboud University, 6525GA, Nijmegen, The Netherlands

9

10 \* To whom correspondence should be addressed

11 Tel: +44 (0) 20 759 41721; Fax: +44 (0) 20 75941759; Email: [k.witmer@imperial.ac.uk](mailto:k.witmer@imperial.ac.uk)

12 Tel: +44 (0) 20 75945342; Fax: +44 (0) 20 75941759; Email: [g.christophides@imperial.ac.uk](mailto:g.christophides@imperial.ac.uk)

13

14

## 15 ABSTRACT

16 Epigenetic regulation of gene expression is an important attribute in the survival and adaptation of  
17 the malaria parasite *Plasmodium* in its human host. Our understanding of epigenetic regulation of  
18 gene expression in *Plasmodium* developmental stages beyond asexual replication in the mammalian  
19 host is sparse. We used chromatin immune-precipitation (ChIP) and RNA sequencing to create an  
20 epigenetic and transcriptomic map of the murine parasite *Plasmodium berghei* development from  
21 asexual blood stages to male and female gametocytes, and finally, to ookinetes. We show that  
22 heterochromatin 1 (HP1) almost exclusively associates with variably expressed gene families at  
23 subtelomeric regions and remains stable across stages and various parasite lines. Variant  
24 expression based on heterochromatic silencing is observed only in very few genes. In contrast, the  
25 active histone mark histone 3 Lysine 9 acetylation (H3K9ac) is found between heterochromatin  
26 boundaries and occurs as a sharp peak around the start codon for ribosomal protein genes. H3K9ac  
27 occupancy positively correlates with gene transcripts in asexual blood stages, male gametocytes  
28 and ookinetes. Interestingly, H3K9ac occupancy does not correlate with transcript abundance in  
29 female gametocytes. Finally, we identify novel DNA motifs upstream of ookinete-specific genes  
30 thought to be involved in transcriptional activation upon fertilization.

31

## 32 INTRODUCTION

33 Malaria is caused by apicomplexan parasites of the genus *Plasmodium* and is transmitted to humans  
34 through bites of anopheline mosquitoes. Malaria clinical cases and deaths decreased significantly  
35 over the past decade but began to stabilize since 2015 indicating that current measures have now  
36 reached their maximum capacity and that new measures are urgently needed (1). Parasite  
37 transmission through the mosquito vector is a natural bottleneck in its development and a favourable  
38 stage for interventions aiming at malaria control and elimination. Therefore, research towards  
39 understanding parasite development in the mosquito has been intensified in recent years.

40 Haploid parasites cyclically infect and asexually replicate in the infected red blood cells (iRBCs) of  
41 the host causing disease pathology. Eventually, some parasites escape this cycle and form sexual  
42 forms called gametocytes, the stage infective to mosquitoes. In the mosquito gut lumen, ingested  
43 gametocytes are activated to form gametes. Female gametocytes exit iRBCs, and messenger RNAs  
44 (mRNAs), stored in a messenger ribonucleoprotein (mRNP) complex, become available for  
45 translation (2, 3). Activation of male gametocytes involves three rapid rounds of endomitosis leading  
46 to eight flagellated microgametes, a process called exflagellation (4). After fertilization, the zygote  
47 embarks on a meiotic endoreplication cycle while traversing the mosquito midgut epithelium in the  
48 form of an ookinete that upon arrival at the midgut basal side transforms into an oocyst (5). Over the  
49 next days, endomitotic replication in the oocyst produces hundreds of sporozoites that, upon oocyst  
50 rupture, travel to the mosquito salivary gland for inoculation into a vertebrate host with the next  
51 mosquito bite.

52 Epigenetic regulation is important for parasite survival within the human host (6). Genes involved in  
53 host-parasite interactions or coding for virulence factors or ligands involved in RBC invasion are  
54 epigenetically regulated (7, 8), while some genes involved in drug resistance are epigenetically  
55 switched on or off in an environment-dependent manner (9). Importantly, expression of parasite  
56 antigens in the mouse host is reset after its passage through the mosquito, suggesting that  
57 epigenetic imprinting may be erased during the mosquito stage (10).

58 *P. falciparum* HP1 (*PfHP1*) is shown to bind exclusively to histone 3 lysine 9 tri-methylation  
59 (H3K9me3) and be the hallmark of transcriptionally silent heterochromatin (7, 11). Heterochromatic  
60 loci are largely confined to telomeric and subtelomeric regions as well as chromosome-central  
61 islands and almost invariably associated with variably expressed multigene protein families (7, 11–  
62 15). In contrast, the universal histone mark linked to euchromatin H3K9ac is shown to be related to  
63 active transcription in *P. falciparum* asexual blood stages (12, 14).

64 The binding of transcription factors on the gene promoter region is heavily dependent on the state  
65 of the surrounding chromatin. Members of the apicomplexan-specific ApiAP2 family of transcription  
66 factors are found to control major cell fate decision events in the parasite lifecycle, in addition to

67 housekeeping processes (16–21). AP2-G is shown to be the master regulator of gametocytogenesis  
68 (20, 21), activating a number of gametocyte-specific genes (22). Similarly, the ookinete-specific AP2-  
69 O, which is itself regulated by the mRNP complex, activates transcription of over 400 genes needed  
70 for ookinete development and mosquito midgut traversal (17, 23). Three additional ookinete-specific  
71 ApiAP2 transcription factors have been identified, which play a role just before or after ookinete  
72 formation (16).

73 Here, we investigate how epigenetic traits change in the murine malaria parasite *P. berghei* during  
74 its transition from the murine host to the mosquito vector, using asexual blood stages (ABS), female  
75 (FG) and male (MG) gametocytes, and ookinetes (OOK). We find a conserved distribution of  
76 heterochromatin through parasite development, and surprisingly little difference between different  
77 parasite lines. In all stages, heterochromatin is confined to subtelomeric regions, except two  
78 chromosomal central loci encompassing genes encoding the oocyst capsule protein Cap380 and a  
79 conserved protein of unknown function (PbANKA\_0934600). Implementing transcriptomics we  
80 identify that variant expression of multigene families genes occurs in all developmental stages and  
81 not only in ABS. In stark contrast to heterochromatin, the distribution of H3K9ac is dynamic  
82 throughout parasite development, and peaks around the start codon of ribosomal protein genes. In  
83 consistence with previous findings, H3K9ac enrichment in gene 5' untranslated regions (5'UTRs)  
84 correlates with transcript levels in ABS. Additionally, H3K9ac enrichment correlates with increased  
85 transcript abundance in MG and OOK but not in FG suggesting a different epigenetic state of FG  
86 compared to other developmental stages. Finally, we identify four novel DNA motifs in addition to  
87 the AP2-O enriched in the 5'UTR of OOK-specific genes, suggesting that additional transcription  
88 factors are involved in orchestrating transcription in OOK. Our study adds substantially to our  
89 understanding of malaria transmission biology.

90

## 91 MATERIAL AND METHODS

### 92 Parasites

93 *P. berghei* clone ANKA 2.33 (for asexual blood stages) (24), the *507m6cl1* (*c507*) line (for ookinetes)  
94 (25) were maintained in 6–8 week old female Tuck's Ordinary (TO) (Harlan, UK). The *820cl1m1cl1*  
95 (*wt-fluo*) line (for gametocytes) (26) was maintained in 6–8 week old female CD1 mice (Harlan, UK).

### 96 Chromatin extraction and fragmentation

97 Asexual blood stage parasites were harvested via heart puncture and passed through a Plasmodipur  
98 filter (Europroxima) to remove leucocytes, resuspended in RPMI-1640 medium (Sigma-Aldrich) and  
99 crosslinked with 1% formaldehyde in PBS for 10min at 37°C. Crosslinking was quenched adding  
100 glycine to an end concentration of 0.125M. RBC were then lysed with 0.15% saponin (in PBS) for 5-  
101 10 minutes on ice. To obtain nuclei the resulting parasite pellet was lysed with cell lysis buffer (20  
102 mM Hepes, 10mM KCl, 1mM EDTA, 1mM EGTA, 0.65% NP-40, 1mM DTT, 1x protease inhibitor  
103 (Roche)). The pellet was resuspended in sonication buffer (1% SDS, 50mM Tris pH8, 10 mM EDTA,  
104 1x protease inhibitor (cOmplete™, Mini, EDTA-free, Roche)) and sheared for 25 minutes (30sec ON,  
105 30 sec OFF; settings HIGH) using a Bioruptor® Plus sonication device (Diagenode) to obtain DNA  
106 fragments of around 100-300bp.

107 The method for the purification of gametocytes was modified from (27). Briefly, mice were pretreated  
108 by intra peritoneal injection of 0.2 ml phenylhydrazine (6 mg/ml in PBS) to stimulate reticulocyte  
109 formation two days prior to infection with parasites. Gametocyte-enriched blood was harvested via  
110 heart puncture and blood was immediately resuspended in 4°C coelenterazine loading buffer (CLB)  
111 (1x PBS, 20 mM HEPES, 20 mM glucose, 4 mM sodium bicarbonate, 1 mM EDTA, 0.1% BSA in  
112 PBS, pH 7.24–7.31) and magnet-purified using D Columns on a SuperMACS™ II Separator (Miltenyi  
113 Biotec). Magnet-purified parasites were crosslinked in 1% formaldehyde for 10 minutes at 37°C,  
114 quenched with glycine to an end concentration of 0.125M and resuspended in FACS buffer (PBS  
115 with 2mM HEPES, 2mM glucose, 0.4mM NaHCO<sub>3</sub>, 0.01% BSA, 2.5mM EDTA). Male and female  
116 gametocytes were sorted according to color (GFP for males and RFP for females) on a FACSAria

117 III with a 70uM nozzle at 4°C. Purified gametocyte pellets were lysed in 150ul sonication buffer and  
118 chromatin prepared as above.

119 Ookinetes were cultured *in vitro* as described (Rodríguez et al., 2002). Briefly, mice were pretreated  
120 by intra peritoneal injection of 0.2 ml phenylhydrazine (6 mg/ml in PBS) to stimulate reticulocyte  
121 formation two days prior to infection with parasites. Gametocyte-enriched blood was harvested via  
122 heart puncture and blood was immediately resuspended in 30ml of ookinete medium (RPMI-HEPES  
123 complemented with 100uM xanthurenic acid, 200 uM hypoxanthine and 10% BSA, pH7.4) and  
124 incubated at 21°C for 24 hours. After 24 hours, ookinetes were magnet-purified using 1ul monoclonal  
125 anti-P28 antibody 13.1 (Winger et al., 1988) coupled to 10ul magnetic beads (Dynabeads™ M-280  
126 Sheep Anti-Mouse IgG). Purified ookinetes were crosslinked in 1% formaldehyde for 10 minutes at  
127 37°C, quenched with glycine to an end concentration of 0.125M. Purified ookinetes pellets were  
128 lysed in 150ul sonication buffer and chromatin was prepared as above.

## 129 Chromatin immunoprecipitation

130 Antibodies used for ChIP were rabbit anti H3K9ac (Diagenode Cat# C15410004,  
131 RRID:AB\_2713905) and rabbit anti-*PbHP1* (15). 1ug antibody was incubated with up to 500ng  
132 chromatin in ChIP buffer (5% TritonX-100, 750 mM NaCl, 5 mM EDTA, 2.5 mM EGTA, 100 mM  
133 Hepes) at 4°C over night. The next day, 50ul Protein A Dynabeads (Fisher 10001D) were added and  
134 further incubated for 1-2 h. After washing with buffers containing 100, 150 and 250 mM NaCl,  
135 immunoprecipitated DNA was eluted and purified using PCR minelute purification columns (Qiagen).

136 For each antibody several ChIP reactions were performed in parallel to obtain sufficient amount of  
137 DNA for ChIP-seq: (asexual blood stages (3xH3K9ac and 8x *PbHP1*); female/male gametocytes (3x  
138 H3K9ac and 6x *PbHP1*); ookinetes (2x H3K9ac and 5x *PbHP1*)).

139 For each stage, the following numbers of biological replicates were pooled to obtain enough material:  
140 ABS (1); FG (5), MG(5), OOK (2).

## 141 ChIP sequencing

142 For each sequencing library up to 10 ng of ChIP or input DNA were end-repaired, extended with 30  
143 A-overhangs and ligated to barcoded NextFlex adapters (Bio Scientific) as described previously (28).  
144 Libraries were amplified (98°C for 2 min; four cycles 98°C for 20 sec, 62°C for 3 min; 62°C for 5 min)  
145 using KAPA HiFi HotStart ready mix (KAPA Biosystems) and NextFlex primer mix (Bio Scientific) as  
146 described (29). 225-325 bp fragments (including the 125 bp NextFlex adapter) were size- selected  
147 using a 2% E-Gel Size Select agarose gel (Thermo Fisher Scientific) and amplified by PCR for ten  
148 (asexual blood stages and ookinetes) or eleven (female and male gametocytes) cycles under the  
149 same condition as described above. Library purification and removal of adapter dimers was  
150 performed with Agencourt AMPure XP beads in a 1:1 library:beads ratio (Beckman Coulter). ChIP-  
151 seq libraries were sequenced for 75 bp single-end reads using the NextSeq 500/550 High Output v2  
152 kit (Illumina) on the Illumina NextSeq 500 system.

153 Sequencing reads were mapped against the *P. berghei* ANKA reference genome v3 using BWA  
154 samse (v0.7.12-r1039) (30) (and filtered to mapping quality  $\geq 15$  (SAMtools v1.2) (31). Only uniquely  
155 mapped reads were used for further analysis. The PCA plot was calculated using default settings in  
156 the DeepTools2 suite (32) using non-overlapping 1000bp bins.

## 157 *PbHP1* analysis

158 The bam files containing mapped reads from each ChIP was normalised against its input using  
159 *bamcompare* in DeepTools2 (32). For *PbHP1*, the default settings were used with the following  
160 changes: 100bp bin size, 0.01 pseudocount and 1000bp smoothing.

161 The mean of the log2 *PbHP1*/input ratio was then extracted for each gene, making each gene fit  
162 500bp using one 500bp bin using *computematrix* in DeepTools2 (32) with default settings with the  
163 following changes: missing values = 0 and skip 0. The resulting *bigwig* files were hierarchically  
164 clustered with average linkage and Euclidean distance as similarity metric in Cluster3.0 (33). The  
165 resulting heatmap and tree was inspected in Treeview (34).



166 The multigene family list is based on Table S4 from Otto et al, (35), and we updated gene IDs to the  
167 *P. berghei* genome version 3 and found 379 genes.

168 For visualising our data next to (15) we used their *PbHP1* over input bedgraph file from the GEO  
169 database (GSE102695) and viewed it in IGV (36). Chromosome plots were drawn using Phenogram  
170 (<http://visualization.ritchielab.psu.edu/phenograms>).

### 171 H3K9ac analysis

172 The bam files containing aligned reads from each ChIP was normalised against its input using  
173 *bamcompare* from the *DeepTools2 suite* (32). For H3K9ac, default settings were using with the  
174 following changes: bin size 50bp, 0.01 pseudocount, 100bp smoothing. Analysis using heatmaps  
175 and summary plots were performed using the *deeptools2* (32) suite on *usegalaxy.org* as well as  
176 *usegalaxy.eu*.

177 For the ribosomal subunit genes, we used the *P. berghei* orthologues from *P. falciparum* reported in  
178 (37). For statistical analysis and drawing of boxplots, we used Graphpad Prism 7.03. Wilcoxon  
179 matched-pairs signed rank test was performed on each data set and P-values <0.01 are reported,  
180 with (\*\*\*\*)  $P \leq 0.0001$ .

### 181 Motif identification

182 5' UTRs were extracted from *PbANKA* genome version 3. Sequences between annotated genes  
183 were attributed to the nearest gene as follows. For head-to-head genes, the 5' UTRs were split 1:1.  
184 For tail-to-head genes, the sequence was split 1:2 (1/3 was assigned as 3' downstream region to  
185 the gene ending and 2/3 was assigned as 5' UTR to the gene starting). To find motifs enriched in  
186 ookinete-expressed genes, we used DREME (v 5.0.0) (38) with default settings locally on the MEME  
187 suite (39).

188 We used the build-in Gene Ontology tool of PlasmoDB with default settings to identify enriched GO  
189 terms (40).

### 190 RNA preparation

191 Asexual blood stage parasites were harvested via heart puncture and resuspended in 15ml RPMI-  
192 HEPES and passed through a Plasmodipur filter (Europroxima) to remove white blood cells.  
193 Parasite/RBC pellet was lysed with 10ml RBC-lysis buffer (150mM  $\text{NH}_4\text{Cl}$ , 10mM  $\text{KHCO}_3$ , 1mM  
194 EDTA) for 20min on ice. Parasite-pellets were washed once in ice-cold PBS and lysed in 500ul  
195 TRIzol (Invitrogen) and stored at  $-80^\circ\text{C}$ .

196 The method for the purification of gametocytes was modified from (27). Briefly, mice were pretreated  
197 by intra peritoneal injection of 0.2 ml phenylhydrazine (6 mg/ml in PBS) to stimulate reticulocyte  
198 formation two days prior to infection with parasites. Gametocytes were harvested via heart puncture  
199 and blood was immediately resuspended in  $4^\circ\text{C}$  coelenterazine loading buffer (CLB) (1x PBS, 20 mM  
200 HEPES, 20 mM glucose, 4 mM sodium bicarbonate, 1 mM EDTA, 0.1% BSA in PBS, pH 7.24–7.31)  
201 and magnet-purified using D Columns on a SuperMACS™ II Separator (Miltenyi Biotec). Magnet-  
202 purified parasites were resuspended in FACS buffer (PBS with 2mM HEPES, 2mM glucose, 0.4mM  
203  $\text{NaHCO}_3$ , 0.01% BSA, 2.5mM EDTA). Male and female gametocytes were sorted according to color  
204 (GFP for males and RFP for females) on a FACS Aria III with a 100uM nozzle at  $4^\circ\text{C}$ . Purified  
205 gametocyte pellets were lysed in 500ul TRIzol (Invitrogen) and stored at  $-80^\circ\text{C}$ .

206 Ookinetes were cultured *in vitro* as described (Rodríguez et al., 2002). Briefly, mice were pretreated  
207 by intra peritoneal injection of 0.2 ml phenylhydrazine (6 mg/ml in PBS) to stimulate reticulocyte  
208 formation two days prior to infection with parasites. Gametocytes-enriched blood was harvested via  
209 heart puncture and blood was immediately resuspended in 30ml of ookinete medium (RPMI-HEPES  
210 complemented with 100uM xanthurenic acid, 200 uM hypoxanthine and 10% BSA, pH7.4) and  
211 incubated at  $21^\circ\text{C}$  for 24 hours. After 24 hours, ookinetes were magnet-purified using 1ul monoclonal  
212 anti-P28 antibody 13.1 (Winger et al., 1988) coupled to 10ul magnetic beads (Dynabeads™ M-280  
213 Sheep Anti-Mouse IgG) and resuspended in 500ul TRIzol (Invitrogen) and stored at  $-80^\circ\text{C}$ .

214 Genomic DNA was used as a control for the library preparation protocol. For this, asexual blood  
215 stage parasites were harvested via heart puncture and resuspended in 15ml RPMI-HEPES and  
216 passed through a Plasmodipur filter (Europroxima) to remove white blood cells. Parasite/RBC pellet  
217 was lysed with 10ml RBC-lysis buffer (150mM NH<sub>4</sub>Cl, 10mM KHCO<sub>3</sub>, 1mM EDTA) for 20min on ice.  
218 Parasite-pellets were washed once in ice-cold PBS and lysed in buffer A (500mM NaAc, 100mM  
219 NaCl, 1mM EDTA, pH5.2) and 3% SDS. DNA was extracted using phenol:chloroform and sheared  
220 to 150bp fragments on a Bioruptor® Plus sonication device (Diagenode).

## 221 RNA sequencing

222 RNA was extracted using the Direct-zol™ RNA MiniPrep kit (Zymo). Residual gDNA was digested  
223 with the TurboDNA-free kit (Ambion). Stranded RNA sequencing libraries were prepared using the  
224 RNA HyperPrep Kit (KAPA) following manufacturer's protocol with the exception of the amplification  
225 step set to 60°C. The RNA library was sequenced in 43bp paired-end reads on a Illumina NextSeq  
226 500 sequencer and each sample was split over four non-independent lanes.

227 RNAseq was performed using biological triplicates for each condition.

228 We used sheared genomic DNA (gDNA) as a technical control and did not observe a bias towards  
229 GC-rich(er) sequences (**Figure S2A**), a known problem in *Plasmodium falciparum* NGS (14).

## 230 RNA sequencing analysis

231 Quality of the reads were checked by eye using FASTQC. Reads were aligned separately for each  
232 lane to *PbANKA* genome v3 using HiSat2 with default settings (v 2.0.5.2; --max intron size 5000; --  
233 fr) (41). Mapped reads were pooled into one bam file per condition and replicate. Importantly, to  
234 adjust for potential GC-bias gDNA was processed alongside RNA samples as a control for the RNA  
235 library preparation. GC-bias was calculated according to (42) using the default settings for  
236 *computeGCBias* in DeepTools2 suite (32).

237 The PCA plot was calculated using default settings in the DeepTools2 suite (32).

238 We calculated the FPKM (Fragments Per Kilobase of transcript per Million mapped reads) value for  
239 each gene using featurecounts with default settings (43).

240 For comparative transcriptomics we used Deseq2 (v2.11.39) with default settings (44). We  
241 considered significantly differently regulated genes as having a p value of lower than 0.001 (adjusted  
242 for multiple testing with the Benjamini-Hochberg procedure which controls false discovery rate  
243 (FDR)).

244 All of the analysis has been performed using usegalaxy.org (an open source, web-based platform  
245 for data intensive biomedical research) (45) unless stated otherwise. Additionally, usegalaxy.eu was  
246 used for some calculations.

247

## 248 RESULTS

### 249 Generation of epigenetic and transcriptional profiles

250 ChIP was carried out on *P. berghei* mixed ABS, FG, MG and OOK using antibodies against *P.*  
251 *berghei* HP1 (*PbHP1*) (15) and H3K9ac. To prevent sample contamination, ABS were sampled from  
252 the non-gametocyte producer ANKA 2.33 parasite line (24). MG and FG were isolated from the  
253 *820cl1m1cl1* (wt-fluo) line (26) using flow cytometry sorting. Purified OOK were prepared from *in*  
254 *vitro* cultures of the *507m6cl1* line (25), 24 hours post gametocyte activation. Immuno-precipitated  
255 DNA was amplified and subjected to next-generation sequencing (NGS). Principal component  
256 analysis (PCA) showed that H3K9ac and *PbHP1* samples are clustered together and separately  
257 from each other, respectively, suggesting that euchromatin and heterochromatin occupancies differ  
258 from each other but are similar between the three stages and parasite lines (**Figure 1A**).

259 To investigate the link between epigenetic profiles and gene expression, we complemented the  
260 epigenetic profiles with transcriptomics data from the same stages and parasite lines by RNAseq.  
261 PCA analysis showed that transcription profiles of ABS and MG are more similar to each other than  
262 to the other two stages, and that transcription profiles of FG are more related to OOK  
263 (**Supplementary Figure 1**).

## 264 **Mutually exclusive profiles of heterochromatin and euchromatin**

265 Bar plots of ChIPped vs input chromatin showed that heterochromatin is confined to telomeric and  
266 subtelomeric regions of all chromosomes, except from the right arm of chromosome 4, in contrast to  
267 H3K9ac that is detected in all other chromosomal regions (**Figure 1B**). Ten subtelomeric regions  
268 could only be partially mapped due to their repetitive nature. As shown in the example of  
269 chromosome 8 (**Figure 1C**), but observed for all chromosomes and in all stages, centromeres do  
270 not show enrichment in heterochromatic marks (46). Interestingly, *P. berghei* chromosomes are  
271 largely devoid of chromosome internal heterochromatin islands, in contrast to most other  
272 *Plasmodium* species (15).

273 To identify heterochromatic genes we calculated the mean *PbHP1* occupancy ( $\log_2$  ratio of *PbHP1*  
274 ChIP to input) of the gene open reading frame (ORF) and performed hierarchical clustering. Only  
275 two non-telomeric and non-subtelomeric genomic regions showed clear heterochromatic profiles.  
276 The first region encompasses *PBANKA\_0934600*, a gene encoding a large, conserved protein of  
277 unknown function with orthologues in all *Plasmodium* species (**Figure 1D**). This region is  
278 heterochromatic in all four stages investigated. Transcript levels of *PBANKA\_0934600* are very low  
279 (Fragments Per Kilobase of transcript per Million mapped reads (FPKM) <10) suggesting that the  
280 gene is not expressed in any of the stages investigated here (**Supplementary Table 1**). Proteomic  
281 data indicate that its *P. falciparum* ortholog (*PF3D7\_1113000*) is expressed in sporozoites (47).  
282 Nevertheless, a previous study showed that *PBANKA\_0934600* is redundant for *P. berghei*  
283 transmission (48).

284 The second chromosome-central heterochromatic region corresponds to *cap380* and appears to be  
285 epigenetically silenced in ABS, FG and MG but not in OOK (**Figure 1E**). Indeed, OOK display  
286 increased levels of relative *cap380* transcripts, which coincide with a sharp H3K9ac peak within the  
287 *cap380* 5'UTR. *Cap380* transcription is controlled by AP2-O (23, 35) and the protein is expressed in  
288 early-stage oocysts and localizes to the oocyst capsule (49, 50). Our data provide evidence that  
289 heterochromatic silencing is an additional regulatory level of *cap380* expression, presumably  
290 preventing its premature transcription.

291 A third region that showed clear heterochromatic marks by visual inspection but could not be  
292 classified as heterochromatic by our analysis algorithm encompasses the gene encoding AP2-G  
293 (*PbANKA\_1437500*; **Figure 1F**). Expression of *P. falciparum* AP2-G is epigenetically controlled by  
294 *PfHP1* (51). The weak levels of *PbHP1* marking of this region in our analysis could be explained by  
295 our choice of the ANKA 2.33 parasite line. This line carries a mutation in the *ap2-g* gene resulting in  
296 expression of a truncated, non-functional protein unable to induce gametocytogenesis (21), thereby  
297 making its epigenetic silencing redundant.

## 298 **Epigenetic silencing of subtelomeric multigene families**

299 Our analysis revealed that as many as 221 genes (including pseudogenes) located in subtelomeric  
300 regions are significantly enriched in *PbHP1* binding (**Figure 1G, Supplementary Table 1**). Of these,  
301 214 belong to the rodent malaria parasite (RMP) multigene family (35). It has been previously  
302 established that *Plasmodium* heterochromatin is largely associated with gene families involved in  
303 antigenic variation and host-parasite interactions (7, 15). Out of the 214 heterochromatic RMP  
304 genes, 141 belong to the *pir* (*Plasmodium* interspersed repeat) family that comprises 200 genes and  
305 pseudogenes. It is the largest multigene family in *P. berghei* and its members show variegated  
306 expression across stages and between acute and chronic infections (35, 52, 53). In *P. chabaudi*,  
307 changes in expression of the orthologues *cir* gene family have been associated with parasite  
308 virulence (10).

309 Thirty and 26 of the identified heterochromatic genes belong to the *fam-a* and *fam-b* families,  
310 respectively. Members of the *fam-a* family have a steroidogenic acute regulatory-related lipid transfer  
311 (START) domain and can transfer phosphatidylcholine *in vitro*, suggesting that these proteins are  
312 involved in lipid transport for membrane synthesis (53). Most *fam-b* members have a PYST-B  
313 domain, a signal peptide and a PEXEL motif as well as a transmembrane domain (35). Proteins  
314 encoded by the *pir*, *fam-a* and *fam-b* families are exported into the iRBC (54). While the *fam-a* family  
315 is present in all *Plasmodium* species, the *fam-b* family is specific to rodent malaria parasites.

316 Eleven of the heterochromatic, subtelomeric genes belong to the putative reticulocyte binding protein  
317 family (aka *Pb235*) (55), and three of them encode unknown *Plasmodium* exported proteins. Finally,  
318 erythrocyte membrane antigen 1, erythrocyte membrane associated protein 1 and a tryptophan-rich  
319 protein pseudogene are also heterochromatic.

320 Only seven subtelomeric heterochromatic genes do not belong to RMP multigene families (**Figure**  
321 **1H**). They include: *PBANKA\_1246600* that encodes CP1, an atypical PEXEL protein exported to  
322 discrete structures in the cytosol of iRBCs (56); *PBANKA\_0216721* and *PBANKA\_1465051* both  
323 encoding exported proteins of unknown function; *PBANKA\_0317081* encoding a conserved rodent  
324 malaria parasite protein; *PBANKA\_1300500* encoding a putative tubulin epsilon chain;  
325 *PBANKA\_1400031*, a putative pseudogene encoding a tryptophan-rich antigen; and  
326 *PBANKA\_0601200* encoding a dynein heavy chain.

327 *PBANKA\_0601200* is one of 22 dynein-related proteins annotated in the *P. berghei* genome (**Figure**  
328 **S2**). Dyneins are one of three cytoskeletal motor protein families in eukaryotes and made up of a  
329 protein complex of heavy, light and intermediate chain. Intriguingly, *PBANKA\_0601200* is the only  
330 heterochromatic dynein gene in this study but not orthologous to neither of two heterochromatic  
331 dynein heavy chain-encoding genes found in *P. falciparum* blood stages (Flueck et al., 2009). Our  
332 data show that the gene is transcribed in MG, and its promoter is rich in H3K9ac binding in  
333 gametocytes (**Figure S2**). Its knockout is associated with slow ABS growth (57). It is interesting that  
334 of six dynein genes located close to telomeres, only *PBANKA\_0601200* is found to be  
335 heterochromatic in our study.

336 In summary, our data show that similar to other *Plasmodium* species (15), subtelomeric multigene  
337 families are epigenetically silenced via *PbHP1* throughout *P. berghei* development. Interestingly, and  
338 in contrast to *P. falciparum* (15), we did not observe any expansion of heterochromatic boundaries  
339 throughout the *P. berghei* lifecycle.

#### 340 **Variant developmental expression of heterochromatic genes**

341 Stochastic changes in heterochromatin distribution result in clonal variant gene expression, which  
342 forms the basis of *P. falciparum* antigenic variation (6). Since different parasite lines were used in  
343 our study (except FG and MG that derived from the same line), we could not directly determine  
344 whether differences in heterochromatin distribution are due to the line epigenetic background or  
345 developmental stage, nonetheless, comparative heterochromatic profiling would capture the sum of  
346 both. We compared the heterochromatic profiles of genes across development, and found a  
347 surprisingly small number of 16 genes with differential heterochromatin occupancy between stages  
348 (**Figure 2A** and **Supplementary Figure S3**). This small number stands in sharp contrast to the 252  
349 genes shown to exhibit clonal variant expression in *P. falciparum* ABS alone (58). Thirteen of the 16  
350 genes belonged to multigene families, and 12 showed *PbHP1* enrichment in FG but not in MG. Since  
351 both gametocyte samples were derived from the same line (26), these data could indicate true  
352 developmental epigenetic differences that in turn could imply that heterochromatin occupancy is  
353 reorganized during gametocyte development. However, transcript abundance of these 12 genes was  
354 very low (<10 FPKM) in all lifecycle stages examined (**Supplementary Table 1**), suggesting that  
355 absence of *PbHP1* occupancy may not necessarily result in an active transcriptional state.

356 To identify if variegated clonal expression is present in *P. berghei* stages, we arbitrarily selected all  
357 heterochromatic genes with more than 10 FPKM (mean of three replicates) in at least one  
358 developmental stage. Using this approach, we identified an additional 35 genes in ABS, 17 genes in  
359 FG, 37 genes in MG and 8 genes in OOK, respectively, which are likely variably expressed (**Figure**  
360 **2B**). Most of these heterochromatic genes display additional euchromatic H3K9ac marks, mainly in  
361 their 5'UTR and some of them show very high transcript levels (**Figure 2B**). For example, despite



362 the *PbANKA\_0300600* ORF being heterochromatic, its 5'UTR is enriched in H3K9ac and the gene  
363 is highly expressed in all stages (**Figure 2C**). This suggests that *PbANKA\_0300600* is expressed in  
364 only a subset of cells. Similarly, the epsilon-tubulin ORF is heterochromatic in all stages but shows  
365 euchromatic traits and high transcript levels in both MG and FG (**Figure 2D**). The function of epsilon-  
366 tubulin in *Plasmodium* is unknown, but the protein is known to mark the older of the two human  
367 centrioles upon centrosome duplication (59) and be an essential part of the basal bodies in  
368 *Tetrahymena* (60).

369 Another example of clonally variegated expression includes multigene family members on the right  
370 arm of chromosome 7, displaying both heterochromatin and euchromatin occupancies and high  
371 transcript levels (**Figure 2E**). This is consistent with the finding that some heterochromatic genes  
372 are transcribed by a subset of cells, effectively displaying variegated expression as shown before for  
373 members of putative exported protein families in *P. berghei* (Fougère et al., 2016; Pasini et al., 2013).  
374 Genes displaying hallmarks of clonally variant expression are all located at the heterochromatin-  
375 euchromatin boundaries, which seems to facilitate clonal variation.

### 376 **Distinct H3K9ac distribution in ribosomal protein genes**

377 H3K9ac is a universal histone mark associated with active promoters across the animal kingdom,  
378 including *P. falciparum* ABS, oocysts and sporozoites (12, 61, 62). We investigated the relationship  
379 between H3K9ac distribution and gene transcription across the three *P. berghei* developmental  
380 stages. H3K9ac enrichment in the gene ORF, 1 kb 5'UTR and 500 bp 3'UTR was examined against  
381 transcript abundance for each stage (**Figure 3A**). In consistence with previous findings from *P.*  
382 *falciparum*, a positive correlation was detected between the gene 5'UTR H3K9ac enrichment and  
383 transcriptional levels in ABS (12, 13). We also found that H3K9ac enrichment in the 5'UTR positively  
384 correlates with transcription levels in MG and OOK but less so in FG (**Figure 3B**).

385 A shift of H3K9ac occupancy toward the gene ORF was observed for highly expressed genes, mainly  
386 in ABS and OOK (see arrowheads in **Figure 3A**). Many of the genes with high expression encode  
387 ribosomal proteins. Closer investigation indicated that H3K9ac occupancy sharply peaks around the  
388 start codon of ribosomal protein genes in ABS, FG and OOK (**Figure 3C**). Intriguingly, H3K9ac  
389 occupancy was extended further into the 5'UTR of MG resulting in no clear peak being detected  
390 around the start codon (**Figure 3D**). Further analysis confirmed that the mean H3K9ac enrichment  
391 in the 500 bp 5'UTR of ribosomal genes was significantly different between MG and all other stages  
392 (Wilcoxon signed rank test,  $p \leq 0.0001$ ), but no difference was detected between any of the other  
393 stages (**Figure 3E**). As a control, the same analysis using the 500 bp 3'UTR of these genes did not  
394 show any significant differences between any of the stages (Wilcoxon signed rank test,  $p > 0.3$ )  
395 (**Figure 3F**). Interestingly, relative transcripts of ribosomal protein genes differ between all  
396 developmental stages, with highest transcript numbers found in ABS (**Figure 3G**). We did not detect  
397 a correlation between transcriptional abundance and H3K9ac occupancy. These data clearly show  
398 that genes encoding ribosomal proteins exhibit a different H3K9ac pattern from other genes,  
399 highlighting interesting differences in epigenetic makeup for a specific gene group. It has been  
400 previously suggested that a shift in peak shape can indicate a different function of a gene (63), and  
401 highly dense and narrow distributions of H3K9ac near transcriptional start sites have been  
402 associated with constitutive expression of genes involved in translation in plants (64).

### 403 **H3K9ac enrichment does not correlate with transcript levels in FG**

404 We further wanted to examine the relationship between H3K9ac occupancy and transcript levels in  
405 *P. berghei* development. For this, we identified genes that are differentially expressed between two  
406 related developmental stages and examined their H3K9ac occupancy for each of the two stages  
407 (**Figure 4A, B, C**). Genes upregulated in ABS (1426), MG (1523) or OOK (1641) compared to FG  
408 exhibit greater H3K9ac enrichment in their 5'UTR (1000bp upstream of the start codon) in each  
409 respective stage than genes downregulated in any of these three stages (1429, 1518 and 1534,  
410 respectively) compared to FG (**Figure 4D, E, F**). However, when the same groups of genes were  
411 examined for H3K9ac enrichment in their 5'UTR in FG, upregulated genes in FG showed less (FG  
412 vs. ABS and FG vs. MG) or the same (FG vs. OOK) H3K9ac enrichment than downregulated genes



413 (Figure 4G, H, I). These results indicate that H3K9ac occupancy in the gene 5'UTR is a good  
414 predictor for relative transcript levels in ABS, MG and OOK.

415 We further investigated the absence of positive correlation between H3K9ac and transcript levels by  
416 generating two high-confidence lists of genes that are either upregulated (591 genes) or  
417 downregulated (271 genes) in FG compared to all other stages, respectively (Figure 5A and  
418 Supplementary Table 3). Gene Ontology (GO) analysis using the GO slim version showed that the  
419 former list includes genes involved in cell adhesion, reproduction, motility, differentiation, cell cycle  
420 and locomotion, all of which are characteristic of cells preparing for fertilization and development into  
421 the motile ookinete stage (Figure 5B and Supplementary Table 2). In contrast, downregulated  
422 genes in FG are involved in ribosome biogenesis and translation, suggestive of a translationally less  
423 active FG stage compared to the other three stages. FG are known to produce and store mRNAs  
424 that are translationally repressed (2). Similar to before, these downregulated FG genes show  
425 significantly higher H3K9ac enrichment in their 5'UTRs than genes that are upregulated in FG  
426 (Figure 5C).

427 These data together strongly indicate that H3K9ac, a histone mark otherwise universally associated  
428 with active promoters, does not directly correlate with transcript levels in FG. Instead, it appears that  
429 H3K9ac marks the promoters of most genes in FG irrespective of their transcript levels. Furthermore,  
430 genes that are translationally repressed by the DOZI-complex show lower H3K9ac occupancy  
431 compared to all euchromatic genes, corroborating that high transcript levels do not positively  
432 correlate with H3K9ac in FG (Supplementary Figure S5A-B). Also, H3K9ac enrichment in FG is  
433 unrelated to future transcriptional activity, as AP2-O regulated genes (expected to be active in OOK)  
434 (23) display the same H3K9ac enrichment compared to all euchromatic genes in the *P. berghei*  
435 genome (Supplementary Figure S5C-D). It is therefore possible that FG is a stage where epigenetic  
436 remodeling takes place, and that this remodeling includes universal marking of gene promoters with  
437 H3K9ac.

#### 438 Novel and known DNA motifs control ookinete gene expression

439 In most metazoans as well as in flowering plants, maternally deposited proteins and mRNAs are  
440 responsible for directing early stages of development post fertilization, while *de novo* transcription is  
441 resumed via specific transcription factors, a phase called maternal-to-zygotic transition (MZT). In  
442 *Plasmodium*, maturation of the fertilized female gamete to OOK is dependent upon both de-  
443 repression of maternal mRNAs (2, 65) and *de novo* transcription mediated by ookinete-specific  
444 transcription factors such as AP2-O (16, 17, 23).

445 We further investigated the mechanisms of MZT in *P. berghei* starting with genes that are  
446 differentially upregulated in OOK compared to FG (Figure 4C), and compared them to 464 genes  
447 previously annotated as controlled by AP2-O (23) (Figure 6A). Of the 1641 ookinete-specific genes,  
448 only 302 qualified as AP2-O controlled (Figure 6A), suggesting that not all AP2-O controlled genes  
449 have been annotated to date and/or that additional transcription factor(s) might be involved in  
450 ookinete-specific transcription. Therefore, we searched for DNA-motifs (38) that are significantly  
451 enriched in the 5'UTRs of all 1641 OOK-enriched genes and found two highly significantly enriched  
452 motifs: the AP2-O CTAGCT/CA motif (17) present in 265 genes, and the AAAAAAAA motif found in  
453 as many as 1571 genes (Figure 6A).

454 We repeated the same search on a more stringent list of 357 genes that are at least 8-fold  
455 upregulated in OOK compared to FG; and only 122 qualified as controlled by AP2-O (Figure 6B).  
456 Four DNA-motifs were identified, the most significant of which again resembles the PfAP2-O motif  
457 (TAGCT/CAA/G) and was found in almost half of all genes (164). The other three novel motifs were  
458 CT/AGAACA (in 62 genes), A/GGAGAAAA (in 124 genes) and GTTGTAACA (in 61 genes).

459 These data confirm previous findings that AP2-O is a master regulator of *de novo* transcription and  
460 MZT in *Plasmodium* and indicate the existence of additional transcription factors involved in this  
461 process. It is important to note that while additional OOK transcription factors have been described  
462 (16), none of the published DNA-motifs matches those found here.

## 463 DISCUSSION

464 Our study provides new insights into the epigenetic regulation of *Plasmodium* gene expression  
465 during its developmental transition from asexual to sexual and zygotic stages, which occurs as the  
466 parasite moves from its vertebrate host to the insect vector and is essential for parasite transmission.

467 Epigenetic silencing has been associated with key strategies of parasite development and  
468 environmental adaptations. Our data reveal that HP1-mediated epigenetic silencing remains largely  
469 unchanged during this transition and confined to chromosomal subtelomeric regions. Mapping  
470 *Plasmodium* subtelomeric genes is very challenging as most genes belong to multigene families with  
471 high levels of sequence identity between them. Indeed, as many as 51 heterochromatic genes could  
472 not be mapped to *P. berghei* chromosomes in our analysis: 14 *fam-a*, 8 *fam-b*, 1 *fam-c*, 27 *pir*, and  
473 one encoding a tryptophan-rich antigen.

474 Comparison of our findings with those of Fräschka et al. (15) that analyzed *PbHP1* occupancy in  
475 ABS of the parental *P. berghei* ANKA strain revealed that 177 heterochromatic genes are shared  
476 between the two studies, 46 are specific to our study and 14 are specific to the other study  
477 (**Supplementary Figure S4A**). Whereas the vast majority of differences pertain to subtelomeric  
478 regions, where our analysis appears to be more sensitive, the combination of the two studies  
479 identified four non-subtelomeric heterochromatic genes, of which only *cap380* encoding an oocyst  
480 capsule protein is detected in both studies. On the one hand, *PBANKA\_0934600* that encodes a  
481 protein of unknown function was only detected in our analysis but a closer visual inspection of the  
482 profiles obtained by Fräschka et al. (15) shows extensive occupancy of the gene by *PbHP1*  
483 (**Supplementary Figure S4B**). On the other hand, *ap2-g* and *ap2-sp3/ap2-tel* are not detected as  
484 heterochromatic in our analysis but visual inspection indicates increased *PbHP1* occupancy  
485 (**Supplementary Figure S4C**). These data suggest that automated detection of moderate  
486 heterochromatin enrichment remains a challenge and that conclusions about absence of epigenetic  
487 silencing in such regions should be treated with caution. Nonetheless, the two studies together reveal  
488 that *P. berghei* heterochromatin formation, maintenance and inheritance are largely hardwired  
489 throughout development.

490 It has been previously proposed that epigenetic reprogramming or resetting of the expression of  
491 genes involved in parasite virulence occurs during parasite passage through the vector (10, 66).  
492 However, no such evidence for a reset of virulence is detected pre- and post-meiotically in our study,  
493 which could be explained by two scenarios. Firstly, such reset is likely to start immediately after  
494 nuclear fusion as in higher eukaryotes (67) and thus may have been missed by our study design.  
495 Secondly, any such presumed reset may involve different epigenetic marks than those examined  
496 here. Finally, the virulence-reset hypothesis is based on parasites serially maintained in rodents,  
497 which are known to become more virulent. Therefore, it is probable that the observed phenotype is  
498 based on ill-managed heterochromatin maintenance undetectable by our study.

499 Gametocytes are poised cells that are rapidly activated and transform into respective gametes upon  
500 ingestion by a mosquito. In *P. falciparum*, heterochromatin boundaries are shown to expand outside  
501 telomeres as the parasite lifecycle progresses from ABS to gametocytes (15). However, our data do  
502 not show any major differences in heterochromatin distribution between the various *P. berghei*  
503 lifecycle stages examined. This result can be explained by the fact that genes that become  
504 heterochromatic in *P. falciparum* gametocytes and are involved iRBC remodeling (such as knob  
505 formation) have no clear orthologues in *P. berghei* and highlights differences of heterochromatin  
506 maintenance between the two parasites.

507 Male and female gametocytes are characterized by specific transcriptomes and proteomes (22, 68–  
508 70). However, in our analysis, differential heterochromatin occupancy between these two stages is  
509 limited to 12 genes, suggesting that epigenetic gene silencing is not a key regulatory mechanism of  
510 differential gene expression between male and female gametocytes. In addition, all these genes are  
511 located in subtelomeric regions and 11 of them belong to a multigene family, and thus some of the  
512 detected differences may be due to the method's sensitivity. It remains to be seen whether any of  
513 the 12 genes show true expression differences between male and female gametocytes and relate to  
514 sex-specific functions.

515 A striking difference between male and female gametocytes is the level of H3K9ac occupancy in the  
516 5'UTR of genes, which correlates with transcript abundance in male but not in female gametocytes.

517 Thus it appears that gene transcription in female gametocytes is independent of H3K9ac levels. We  
518 propose that the female gametocyte is a stage of epigenetic remodeling that involves universal  
519 marking of gene promoters with H3K9ac. At the same time, genes that are involved in ribosome  
520 biogenesis and translation are downregulated, a phenomenon that together with translational mRNA  
521 repression by the DOZI-complex suggests that a multilayered mechanism regulating zygotic  
522 development operates in *Plasmodium*.

523 Mature oocytes in mammals, flies and worms are transcriptionally silent when passing through  
524 meiosis I preceding fertilization (71). Additionally, early embryonic development depends solely on  
525 maternally deposited proteins and RNAs and coincides with low or undetectable transcription (72).  
526 Zygotic transcription often resumes after several hours or days post fertilization, a process called  
527 maternal-to-zygotic transition accompanied by zygotic genome activation, and in flies, for example,  
528 is controlled by a master transcription factor that is not necessarily associated with H3K9ac (73).  
529 Additionally, epigenetic reprogramming occurs before and after fertilization, ensuring the transition  
530 from a highly specific cell type back to a totipotency state able to form a new organism. However,  
531 direct comparison of malaria parasite female gametocytes to oocytes of multicellular organisms is  
532 complicated by the fact that malaria parasites undergo meiosis directly after fertilization (74), in  
533 contrast to metazoan cells where meiosis precedes fertilization. Nonetheless, it is tempting to  
534 hypothesise that, similar to higher eukaryotes, (i) the female gametocyte is transcriptionally poised  
535 and (ii) transcription in the ookinete is resumed only from a selected set of genes. While there is no  
536 evidence so far that the female gametocyte is transcriptionally poised, there is evidence for the  
537 second part of the hypothesis. Firstly, when expression of a fluorescent reporter protein is controlled  
538 by an ookinete-specific gene promoter the protein is detected from both the maternal and paternal  
539 genomes in the first 24 hours after fertilization (75). Secondly, if expression of a fluorescent reporter  
540 protein is controlled by an housekeeping gene promoter the protein is detected only from the  
541 maternal genome (75). This could either mean that the paternal genome is silenced, or more likely,  
542 that both parental genomes are transcriptionally poised, and the detected expression stems from  
543 inherited maternal mRNA.

544 Two histone variants associated with active promoters in *P. falciparum* ABS parasites (H2A.Z and  
545 H2B.Z) (14, 76) are significantly downregulated in female gametocytes in this study (**Supplementary**  
546 **Table 2**). As mRNA is stored in the RNP complex in female gametocytes, we do not know which  
547 mRNA is translated into protein and which mRNA is translationally poised at this stage. Thus, it will  
548 be interesting to see if either female gametocytes have a low occurrence of H2A.Z and H2B.Z,  
549 or if these histone variants are not deposited into the chromatin during the early development of the  
550 zygote. Proteomic studies identified both H2A.Z and H2B.Z in female gametocytes in both *P. berghei*  
551 and *P. falciparum* (68, 69), pointing towards the latter possibility. Supportively, in mice, H2A.Z  
552 remains undetectable in embryonic chromatin before the late 2-cell stage (77). Thus, we propose a  
553 scenario where the female gametocyte is transcriptionally poised, and where transcription of stage-  
554 specific genes is resumed in the ookinete stage.

555

## 556 **ACKNOWLEDGEMENTS**

557 The authors wish to acknowledge the support from the FACS-facility from Imperial College London,  
558 namely Jess Rowley and Jane Srivastava. Andy Brockman for extracting the UTRs from the *P.*  
559 *berghei* ANKA genome, Tony Brooks and Paola Niola from UCL for help with RNA sequencing. Bob  
560 MacCallum, Amie Jaye and Dan Lawson for assistance in all things computational. Till S. Voss for  
561 sharing the *PbHP1* antibody before its publication. We are grateful to Jen Hillman for  
562 guidance/assistance on usegalaxy.org and the Freiburg Galaxy team for their assistance using  
563 usegalaxy.eu.

564 *Authors' contributions:* conceptualization, K.W., R.B., D.V., G.K.C.; investigation, K.W.; formal  
565 analysis, K.W., S. F.; resources, R.B, D.V., G.K.C; writing – original draft, K.W.; writing – review &  
566 editing, K.W., S.F., D.V., R.B., G.K.C.; visualization, K.W.

567 *Ethics approval:* All animal procedures were carried out in accordance with the Animal Scientific  
568 Procedures Act 1986 under the UK Home Office Licenses PLL70/7185 and PPL70/8788.

569

## 570 FUNDING

571 This work was supported by the Wellcome Trust [093587/Z/10/Z to G.K.C. and D.V., 107983/Z/15/Z  
572 to G.K.C.], the The Netherlands Organization for Scientific Research [NWO-Vidi 864.11.007 to R.B.];  
573 by an advanced Postdoc.Mobility fellowship from the Swiss National Science Foundation  
574 [P300P3\_158527 to K.W.]; a PhD fellowship from the European Community's Seventh Framework  
575 Program [242095, 290080 to S.K.]. Funding for open access charge: [Wellcome Trust  
576 107983/Z/15/Z]

577

## 578 CONFLICT OF INTEREST

579 The authors declare that they have no competing interests.

580

## 581 REFERENCES

- 582 1. WHO (2018) World Malaria Report 2018. 4. WHO, ISBN 978 92 4 1564403.
- 583 2. Mair,G.R., Braks,J. a M., Garver,L.S., Wiegant,J.C. a G., Hall,N., Dirks,R.W., Khan,S.M.,  
584 Dimopoulos,G., Janse,C.J. and Waters,A.P. (2006) Regulation of sexual development of  
585 Plasmodium by translational repression. *Science*, **313**, 667–9.
- 586 3. Mair,G.R., Lasonder,E., Garver,L.S., Franke-Fayard,B.M.D., Carret,C.K., Wiegant,J.C.A.G.,  
587 Dirks,R.W., Dimopoulos,G., Janse,C.J. and Waters,A.P. (2010) Universal features of post-  
588 transcriptional gene regulation are critical for Plasmodium zygote development. *PLoS Pathog.*,  
589 **6**, e1000767.
- 590 4. Janse,C.J., van der Klooster,P.F., van der Kaay,H.J., van der Ploeg,M. and Overdulve,J.P. (1986)  
591 DNA synthesis in Plasmodium berghei during asexual and sexual development. *Mol. Biochem.*  
592 *Parasitol.*, **20**, 173–82.
- 593 5. Sinden,R.E. (1999) Plasmodium differentiation in the mosquito. *Parassitologia*, **41**, 139–148.
- 594 6. Voss,T.S., Bozdech,Z. and Bártfai,R. (2014) Epigenetic memory takes center stage in the survival  
595 strategy of malaria parasites. *Curr. Opin. Microbiol.*, **20**, 88–95.
- 596 7. Flueck,C., Bartfai,R., Volz,J., Niederwieser,I., Salcedo-Amaya,A.M., Alako,B.T.F., Ehlgén,F.,  
597 Ralph,S. a Cowman,A.F., Bozdech,Z., *et al.* (2009) Plasmodium falciparum heterochromatin  
598 protein 1 marks genomic loci linked to phenotypic variation of exported virulence factors. *PLoS*  
599 *Pathog.*, **5**, e1000569.
- 600 8. Cortés,A., Carret,C., Kaneko,O., Yim Lim,B.Y.S., Ivens,A. and Holder,A.A. (2007) Epigenetic  
601 silencing of Plasmodium falciparum genes linked to erythrocyte invasion. *PLoS Pathog.*, **3**,  
602 1023–1035.
- 603 9. Sharma,P., Wollenberg,K., Sellers,M., Zainabadi,K., Galinsky,K., Moss,E., Nguitragool,W.,  
604 Neafsey,D. and Desai,S. a (2013) An epigenetic antimalarial resistance mechanism involving  
605 parasite genes linked to nutrient uptake. *J. Biol. Chem.*, **288**, 19429–40.
- 606 10. Spence,P.J., Jarra,W., Lévy,P., Reid,A.J., Chappell,L., Brugat,T., Sanders,M., Berriman,M. and  
607 Langhorne,J. (2013) Vector transmission regulates immune control of Plasmodium virulence.  
608 *Nature*, **498**, 228–31.
- 609 11. Lopez-Rubio,J.-J., Mancio-Silva,L. and Scherf,A. (2009) Genome-wide analysis of  
610 heterochromatin associates clonally variant gene regulation with perinuclear repressive centers  
611 in malaria parasites. *Cell Host Microbe*, **5**, 179–90.
- 612 12. Salcedo-Amaya,A.M., van Driel,M. a, Alako,B.T., Trelle,M.B., van den Elzen,A.M.G.,  
613 Cohen,A.M., Janssen-Megens,E.M., van de Vegte-Bolmer,M., Selzer,R.R., Iniguez, a L., *et al.*



- 614 (2009) Dynamic histone H3 epigenome marking during the intraerythrocytic cycle of  
615 *Plasmodium falciparum*. *Proc. Natl. Acad. Sci. U. S. A.*, **106**, 9655–60.
- 616 13. Gupta,A.P., Chin,W.H., Zhu,L., Mok,S., Luah,Y.-H., Lim,E.-H. and Bozdech,Z. (2013) Dynamic  
617 epigenetic regulation of gene expression during the life cycle of malaria parasite *Plasmodium*  
618 *falciparum*. *PLoS Pathog.*, **9**, e1003170.
- 619 14. Bártfai,R., Hoeijmakers,W. a M., Salcedo-Amaya,A.M., Smits,A.H., Janssen-Megens,E.,  
620 Kaan,A., Treeck,M., Gilberger,T.-W., François,K.-J. and Stunnenberg,H.G. (2010) H2A.Z  
621 demarcates intergenic regions of the *Plasmodium falciparum* epigenome that are dynamically  
622 marked by H3K9ac and H3K4me3. *PLoS Pathog.*, **6**, e1001223.
- 623 15. Fraschka,S.A., Filarsky,M., Hoo,R., Niederwieser,I., Yam,X.Y., Brancucci,N.M.B., Mohring,F.,  
624 Mushunje,A.T., Huang,X., Christensen,P.R., *et al.* (2018) Comparative Heterochromatin  
625 Profiling Reveals Conserved and Unique Epigenome Signatures Linked to Adaptation and  
626 Development of Malaria Parasites. *Cell Host Microbe*, **23**, 407-420.e8.
- 627 16. Modrzynska,K., Pfander,C., Chappell,L., Yu,L., Suarez,C., Dundas,K., Gomes,A.R.,  
628 Goulding,D., Rayner,J.C., Choudhary,J., *et al.* (2017) A Knockout Screen of ApiAP2 Genes  
629 Reveals Networks of Interacting Transcriptional Regulators Controlling the *Plasmodium* Life  
630 Cycle. *Cell Host Microbe*, **21**, 11–22.
- 631 17. Yuda,M., Iwanaga,S., Shigenobu,S., Mair,G.R., Janse,C.J., Waters,A.P., Kato,T. and Kaneko,I.  
632 (2009) Identification of a transcription factor in the mosquito-invasive stage of malaria parasites.  
633 *Mol. Microbiol.*, **71**, 1402–14.
- 634 18. Iwanaga,S., Kaneko,I., Kato,T. and Yuda,M. (2012) Identification of an AP2-family protein that is  
635 critical for malaria liver stage development. *PLoS One*, **7**, e47557.
- 636 19. Santos,J.M., Josling,G., Ross,P., Schieler,A., Cristea,I.M., Llina,M., Santos,J.M., Josling,G.,  
637 Ross,P., Joshi,P., *et al.* (2017) Red Blood Cell Invasion by the Malaria Parasite Is Coordinated  
638 by the PfAP2-I Transcription Factor. *Cell Host Microbe*, **21**, 731–741.
- 639 20. Kafsack,B.F.C., Rovira-Graells,N., Clark,T.G., Bancells,C., Crowley,V.M., Campino,S.G.,  
640 Williams,A.E., Drought,L.G., Kwiatkowski,D.P., Baker,D. a., *et al.* (2014) A transcriptional  
641 switch underlies commitment to sexual development in malaria parasites. *Nature*, **507**, 253–7.
- 642 21. Sinha,A., Hughes,K.R., Modrzynska,K.K., Otto,T.D., Pfander,C., Dickens,N.J., Religa,A. a.,  
643 Bushell,E., Graham,A.L., Cameron,R., *et al.* (2014) A cascade of DNA-binding proteins for  
644 sexual commitment and development in *Plasmodium*. *Nature*, **507**, 253–7.
- 645 22. Kent,R.S., Modrzynska,K.K., Cameron,R., Philip,N., Billker,O. and Waters,A.P. (2018) Inducible  
646 developmental reprogramming redefines commitment to sexual development in the malaria  
647 parasite *Plasmodium berghei*. *Nat. Microbiol.*, **3**, 1206–1213.
- 648 23. Kaneko,I., Iwanaga,S., Kato,T., Kobayashi,I. and Yuda,M. (2015) Genome-Wide Identification of  
649 the Target Genes of AP2-O, a *Plasmodium* AP2-Family Transcription Factor. *PLoS Pathog.*,  
650 **11**, e1004905.
- 651 24. Dearsly,A.L., Sinden,R.E. and Self,I.A. (1990) Sexual development in malarial parasites:  
652 Gametocyte production, fertility and infectivity to the mosquito vector. *Parasitology*, **100**, 359–  
653 368.
- 654 25. Janse,C.J., Franke-Fayard,B., Mair,G.R., Ramesar,J., Thiel,C., Engelmann,S.,  
655 Matuschewski,K., Gemert,G.J. Van, Sauerwein,R.W. and Waters,A.P. (2006) High efficiency  
656 transfection of *Plasmodium berghei* facilitates novel selection procedures. *Mol. Biochem.*  
657 *Parasitol.*, **145**, 60–70.
- 658 26. Ponzi,M., Sidén-Kiamos,I., Bertuccini,L., Currà,C., Kroeze,H., Camarda,G., Pace,T., Franke-  
659 Fayard,B., Laurentino,E.C., Louis,C., *et al.* (2009) Egress of *Plasmodium berghei* gametes from  
660 their host erythrocyte is mediated by the MDV-1/PEG3 protein. *Cell. Microbiol.*, **11**, 1272–1288.
- 661 27. Beetsma, a L., van de Wiel,T.J., Sauerwein,R.W. and Eling,W.M. (1998) *Plasmodium berghei*  
662 ANKA: purification of large numbers of infectious gametocytes. *Exp. Parasitol.*, **88**, 69–72.
- 663 28. Hoeijmakers,W. a M., Bártfai,R., François,K.-J. and Stunnenberg,H.G. (2011) Linear



- 664 amplification for deep sequencing. *Nat. Protoc.*, **6**, 1026–36.
- 665 29. Kensche,P.R., Hoeijmakers,W.A.M., Toenhake,C.G., Bras,M., Chappell,L., Berriman,M. and  
666 Bártfai,R. (2016) The nucleosome landscape of Plasmodium falciparum reveals chromatin  
667 architecture and dynamics of regulatory sequences. *Nucleic Acids Res.*, **44**, 2110–2124.
- 668 30. Li,H., Li,H., Durbin,R. and Durbin,R. (2009) Fast and accurate short read alignment with Burrows-  
669 Wheeler transform. *Bioinformatics*, **25**, 1754–1760.
- 670 31. Li,H., Handsaker,B., Wysoker,A., Fennell,T., Ruan,J., Homer,N., Marth,G., Abecasis,G. and  
671 Durbin,R. (2009) The Sequence Alignment/Map format and SAMtools. *Bioinformatics*, **25**,  
672 2078–2079.
- 673 32. Ramirez,F., Ryan,D.P., Gruning,B., Bhardwaj,V., Kilpert,F., Richter,A.S., Heyne,S., Dundar,F.  
674 and Manke,T. (2016) deepTools2: a next generation web server for deep-sequencing data  
675 analysis. *Nucleic Acids Res.*, **44**, 160–165.
- 676 33. de Hoon,M.J.L., Imoto,S., Nolan,J. and Miyano,S. (2004) Open source clustering software.  
677 *Bioinformatics*, **20**, 1453–1454.
- 678 34. Saldanha,A.J. (2004) Java Treeview - Extensible visualization of microarray data. *Bioinformatics*,  
679 **20**, 3246–3248.
- 680 35. Otto,T.D., Böhme,U., Jackson,A.P., Hunt,M., Franke-Fayard,B., Hoeijmakers,W. a M., Religa,A.  
681 a, Robertson,L., Sanders,M., Ogun,S. a, *et al.* (2014) A comprehensive evaluation of rodent  
682 malaria parasite genomes and gene expression. *BMC Biol.*, **12**.
- 683 36. Thorvaldsdóttir,H., Robinson,J.T. and Mesirov,J.P. (2013) Integrative Genomics Viewer (IGV):  
684 high-performance genomics data visualization and exploration. *Brief. Bioinform.*, **14**, 178–92.
- 685 37. Wong,W., Bai,X. chen, Brown,A., Fernandez,I.S., Hanssen,E., Condrón,M., Tan,Y.H., Baum,J.  
686 and Scheres,S.H. (2014) Cryo-EM structure of the Plasmodium falciparum 80S ribosome bound  
687 to the anti-protozoan drug emetine. *Elife*, **3**, e03080.
- 688 38. Bailey,T.L. (2011) DREME: motif discovery in transcription factor ChIP-seq data. *Bioinformatics*,  
689 **27**, 1653–9.
- 690 39. Bailey,T.L., Boden,M., Buske,F.A., Frith,M., Grant,C.E., Clementi,L., Ren,J., Li,W.W. and  
691 Noble,W.S. (2009) MEME Suite: Tools for motif discovery and searching. *Nucleic Acids Res.*,  
692 **37**, W202-8.
- 693 40. Aurrecochea,C., Brestelli,J., Brunk,B.P., Dommer,J., Fischer,S., Gajria,B., Gao,X., Gingle,A.,  
694 Grant,G., Harb,O.S., *et al.* (2009) PlasmoDB: A functional genomic database for malaria  
695 parasites. *Nucleic Acids Res.*, **37**, D539–D543.
- 696 41. Kim,D., Langmead,B. and Salzberg,S.L. (2015) HISAT: a fast spliced aligner with low memory  
697 requirements. *Nat. Methods*, **12**, 357–360.
- 698 42. Benjamini,Y. and Speed,T.P. (2012) Summarizing and correcting the GC content bias in high-  
699 throughput sequencing. *Nucleic Acids Res.*, **40**, e72–e72.
- 700 43. Liao,Y., Smyth,G.K. and Shi,W. (2014) FeatureCounts: An efficient general purpose program for  
701 assigning sequence reads to genomic features. *Bioinformatics*, **30**, 923–930.
- 702 44. Love,M.I., Huber,W. and Anders,S. (2014) Moderated estimation of fold change and dispersion  
703 for RNA-seq data with DESeq2. *Genome Biol.*, **15**, 550.
- 704 45. Afgan,E., Baker,D., van den Beek,M., Blankenberg,D., Bouvier,D., Čech,M., Chilton,J.,  
705 Clements,D., Coraor,N., Eberhard,C., *et al.* (2016) The Galaxy platform for accessible,  
706 reproducible and collaborative biomedical analyses: 2016 update. *Nucleic Acids Res.*, **44**, W3–  
707 W10.
- 708 46. Hoeijmakers,W. a M., Flueck,C., François,K.-J., Smits,A.H., Wetzel,J., Volz,J.C., Cowman,A.F.,  
709 Voss,T., Stunnenberg,H.G. and Bártfai,R. (2012) Plasmodium falciparum centromeres display  
710 a unique epigenetic makeup and cluster prior to and during schizogony. *Cell. Microbiol.*, **14**,  
711 1391–401.

- 712 47. Lindner,S.E., Swearingen,K.E., Harupa,A., Vaughan,A.M., Sinnis,P., Moritz,R.L. and  
713 Kappe,S.H.I. (2013) Total and putative surface proteomics of malaria parasite salivary gland  
714 sporozoites. *Mol. Cell. Proteomics*, **12**, 1127–43.
- 715 48. Lasonder,E., Janse,C.J., Van Gemert,G.J., Mair,G.R., Vermunt,A.M.W., Douradinha,B.G., Van  
716 Noort,V., Huynen,M.A., Luty,A.J.F., Kroeze,H., *et al.* (2008) Proteomic profiling of Plasmodium  
717 sporozoite maturation identifies new proteins essential for parasite development and infectivity.  
718 *PLoS Pathog.*, **4**.
- 719 49. Srinivasan,P., Fujioka,H. and Jacobs-Lorena,M. (2008) PbCap380, a novel oocyst capsule  
720 protein, is essential for malaria parasite survival in the mosquito. *Cell. Microbiol.*, **10**, 1304–  
721 1312.
- 722 50. Itsara,L.S., Zhou,Y., Do,J., Dungal,S., Fishbaugher,M.E., Betz,W.W., Nguyen,T., Navarro,M.J.,  
723 Flannery,E.L., Vaughan,A.M., *et al.* (2018) PfCap380 as a marker for Plasmodium falciparum  
724 oocyst development in vivo and in vitro. *Malar. J.*, **17**, 135.
- 725 51. Brancucci,N.M.B., Bertschi,N.L., Zhu,L., Niederwieser,I., Chin,W.H., Wampfler,R., Freymond,C.,  
726 Rottmann,M., Felger,I., Bozdech,Z., *et al.* (2014) Heterochromatin Protein 1 Secures Survival  
727 and Transmission of Malaria Parasites. *Cell Host Microbe*, **16**, 165–176.
- 728 52. Brugat,T., Reid,A.J., Lin,J.W., Cunningham,D., Tumwine,I., Kushinga,G., McLaughlin,S.,  
729 Spence,P., Böhme,U., Sanders,M., *et al.* (2017) Antibody-independent mechanisms regulate  
730 the establishment of chronic Plasmodium infection. *Nat. Microbiol.*, **2**, 1–9.
- 731 53. Fougère,A., Jackson,A.P., Paraskevi Bechtsi,D., Braks,J.A.M., Annoura,T., Fonager,J.,  
732 Spaccapelo,R., Ramesar,J., Chevalley-Maurel,S., Klop,O., *et al.* (2016) Variant Exported  
733 Blood-Stage Proteins Encoded by Plasmodium Multigene Families Are Expressed in Liver  
734 Stages Where They Are Exported into the Parasitophorous Vacuole. *PLoS Pathog.*, **12**, 1–37.
- 735 54. Pasini,E.M., Braks,J. a, Fonager,J., Klop,O., Aime,E., Spaccapelo,R., Otto,T.D., Berriman,M.,  
736 Hiss,J. a, Thomas,A.W., *et al.* (2013) Proteomic and genetic analyses demonstrate that  
737 Plasmodium berghei blood stages export a large and diverse repertoire of proteins. *Mol. Cell.*  
738 *Proteomics*, **12**, 426–48.
- 739 55. Iyer,J., Grüner,A.C., Rénia,L., Snounou,G. and Preiser,P.R. (2007) Invasion of host cells by  
740 malaria parasites: A tale of two protein families. *Mol. Microbiol.*, **65**, 231–249.
- 741 56. Haase,S., Hanssen,E., Matthews,K., Kalanon,M. and de Koning-Ward,T.F. (2013) The Exported  
742 Protein PbCP1 Localises to Cleft-Like Structures in the Rodent Malaria Parasite Plasmodium  
743 berghei. *PLoS One*, **8**, e61482.
- 744 57. Bushell,E., Gomes,A.R., Sanderson,T., Anar,B., Girling,G., Herd,C., Metcalf,T., Modrzynska,K.,  
745 Schwach,F., Martin,R.E., *et al.* (2017) Functional Profiling of a Plasmodium Genome Reveals  
746 an Abundance of Essential Genes. *Cell*, **170**, 260-272.e8.
- 747 58. Rovira-Graells,N., Gupta,A.P., Planet,E., Crowley,V.M., Pouplana,R. De, Preiser,P.R.,  
748 Bozdech,Z., Mok,S. and Cortés,A. (2012) Transcriptional variation in the malaria parasite  
749 Plasmodium falciparum. *Genome Res.*, **22**, 925–38.
- 750 59. Chang,P., Giddings,T.H., Winey,M. and Stearns,T. (2003) E-tubulin is required for centriole  
751 duplication and microtubule organization. *Nat. Cell Biol.*, **5**, 71–76.
- 752 60. Ross,I., Clarissa,C., Giddings,T.H. and Winey,M. (2013) epsilon-tubulin is essential in  
753 Tetrahymena thermophila for the assembly and stability of basal bodies. *J. Cell Sci.*, **126**, 3441–  
754 3451.
- 755 61. Gómez-Díaz,E., Yerbanga,R.S., Lefèvre,T., Cohuet,A., Rowley,M.J., Ouedraogo,J.B.,  
756 Corces,V.G., Bozdech,Z., Roch,K.G. Le, Llinás,M., *et al.* (2017) Epigenetic regulation of  
757 Plasmodium falciparum clonally variant gene expression during development in Anopheles  
758 gambiae. *Sci. Rep.*, **7**, 40655.
- 759 62. Zanghì,G., Vembar,S.S., Baumgarten,S., Ding,S., Guizetti,J., Bryant,J.M., Mattei,D.,  
760 Jensen,A.T.R., Rénia,L., Goh,Y.S., *et al.* (2018) A Specific PfEMP1 Is Expressed in P.  
761 falciparum Sporozoites and Plays a Role in Hepatocyte Infection. *Cell Rep.*, **22**, 2809–2817.

- 762 63. Cremona,M.A., Sangalli,L.M., Vantini,S., Dellino,G.I., Pelicci,P.G., Secchi,P. and Riva,L. (2015)  
763 Peak shape clustering reveals biological insights. *BMC Bioinformatics*, **16**.
- 764 64. Ha,M., Ng,D.W.-K., Li,W.-H. and Chen,Z.J. (2011) Coordinated histone modifications are  
765 associated with gene expression variation within and between species. *Genome Res.*, **21**, 590–  
766 598.
- 767 65. Guerreiro,A., Deligianni,E., Santos,J.M., Silva,P.A., Louis,C., Pain,A., Janse,C.J., Franke-  
768 Fayard,B., Carret,C.K., Siden-Kiamos,I., *et al.* (2014) Genome-wide RIP-Chip analysis of  
769 translational repressor-bound mRNAs in the Plasmodium gametocyte. *Genome Biol.*, **15**, 493.
- 770 66. Bachmann,A., Petter,M., Krumkamp,R., Esen,M., Held,J., Scholz,J.A.M., Li,T., Sim,B.K.L.,  
771 Hoffman,S.L., Kremsner,P.G., *et al.* (2016) Mosquito Passage Dramatically Changes var Gene  
772 Expression in Controlled Human Plasmodium falciparum Infections. *PLOS Pathog.*, **12**,  
773 e1005538.
- 774 67. Zhou,L. quan and Dean,J. (2015) Reprogramming the genome to totipotency in mouse embryos.  
775 *Trends Cell Biol.*, **25**, 82–91.
- 776 68. Lasonder,E., Rijpma,S.R., Van Schaijk,B.C.L.L., Hoeijmakers,W.A.M.M., Kensche,P.R.,  
777 Gresnigt,M.S., Italiaander,A., Vos,M.W., Woestenenk,R., Bousema,T., *et al.* (2016) Integrated  
778 transcriptomic and proteomic analyses of P. falciparum gametocytes: molecular insight into sex-  
779 specific processes and translational repression. *Nucleic Acids Res.*, **44**, 6087–6101.
- 780 69. Khan,S.M., Franke-Fayard,B., Mair,G.R., Lasonder,E., Janse,C.J., Mann,M. and Waters,A.P.  
781 (2005) Proteome analysis of separated male and female gametocytes reveals novel sex-  
782 specific Plasmodium biology (supplementary). *Cell*, **121**, 675–687.
- 783 70. Yeoh,L.M., Goodman,C.D., Mollard,V., Mcfadden,G.I. and Ralph,S.A. (2017) Comparative  
784 transcriptomics of female and male gametocytes in Plasmodium berghei and the evolution of  
785 sex in alveolates. *BMC Genomics*, **18**.
- 786 71. Seki,Y., Yamaji,M., Yabuta,Y., Sano,M., Shigeta,M., Matsui,Y., Saga,Y., Tachibana,M.,  
787 Shinkai,Y. and Saitou,M. (2007) Cellular dynamics associated with the genome-wide epigenetic  
788 reprogramming in migrating primordial germ cells in mice. *Development*, **134**, 2627–2638.
- 789 72. Tadros,W. and Lipshitz,H.D. (2009) The maternal-to-zygotic transition: a play in two acts.  
790 *Development*, **136**, 3033–42.
- 791 73. Li,X.Y., Harrison,M.M., Villalta,J.E., Kaplan,T. and Eisen,M.B. (2014) Establishment of regions  
792 of genomic activity during the Drosophila maternal to zygotic transition. *Elife*, **3**, 1–20.
- 793 74. Sinden,R.E. and Hartley,R. (1985) Identification of the meiotic division of malarial parasites. *J.*  
794 *Protozool.*, **32**, 742–744.
- 795 75. Ukegbu,C. V., Cho,J.-S., Christophides,G.K. and Vlachou,D. (2015) Transcriptional silencing  
796 and activation of paternal DNA during Plasmodium berghei zygotic development and  
797 transformation to oocyst. *Cell. Microbiol.*, **17**, 1230–1240.
- 798 76. Hoeijmakers,W. a M., Salcedo-Amaya,A.M., Smits,A.H., François,K.-J., Treeck,M., Gilberger,T.-  
799 W., Stunnenberg,H.G. and Bártfai,R. (2013) H2A.Z/H2B.Z double-variant nucleosomes inhabit  
800 the AT-rich promoter regions of the Plasmodium falciparum genome. *Mol. Microbiol.*, **87**, 1061–  
801 73.
- 802 77. Bošković,A., Bender,A., Gall,L., Ziegler-Birling,C., Beaujean,N. and Torres-Padilla,M.E. (2012)  
803 Analysis of active chromatin modifications in early mammalian embryos reveals uncoupling of  
804 H2A.Z acetylation and H3K36 trimethylation from embryonic genome activation. *Epigenetics*,  
805 **7**, 747–757.
- 806

## 807 FIGURES LEGENDS

### 808 **Figure 1. Heterochromatin distribution remains stable during malaria parasite development** 809 **whereas euchromatin distribution is dynamic.**

810 (A) Principal component analysis of  $\log_2$  transformed ChIP over input data. Heterochromatin and  
811 euchromatin cluster away from each other. Data from ABS from a previous heterochromatin study  
812 is included (15).

813 (B) Screenshot of heterochromatin and euchromatin distribution across all 14 *P. berghei*  
814 chromosomes for each developmental stage. Peaks correspond to  $\log_2$  transformed data of either  
815 *PbHP1*-ChIP/input or H3K9ac-ChIP/input.  $\log_2$  scale for *PbHP1* is (-3 to 3) and (-2 to 2) for H3K9ac,  
816 respectively. Letters highlight chromosome-central genes showing enrichment in *PbPH1* binding.  
817 Their close-up view is shown in Fig. 1D-F.

818 (C) Bar chart close-up view of heterochromatin and euchromatin occupancy in chromosome 8. The  
819 approximate location of the centromere (syntenically inferred from *P. falciparum* (46)) is indicated  
820 with arrowheads.

821 (D-E) Chromosome central genes associated with heterochromatin in this study.

822 (F) *ap2-G* does not qualify as heterochromatic in our study. Black boxes show gene of interest, white  
823 boxes indicate neighbouring genes and chevrons indicate the transcriptional orientation for each  
824 gene. Peaks correspond to  $\log_2$ -transformed data of *PbHP1*-ChIP/input (-3 to 3) and H3K9ac-  
825 ChIP/input (-2 to 2).

826 (G) Pie chart of identified heterochromatic genes (including pseudogenes) grouped into gene  
827 families as described previously (35). The number of genes in each family is shown in parentheses.

828 (H) Description of seven heterochromatic genes not belonging to known multigene families.

829 ABS, asexual blood stages; FG, female gametocytes; MG, male gametocytes; OOK, ookinetes

830

### 831 **Figure 2. A subset of subtelomerically located genes shows signs of variant expression.**

832 (A) Genes with varying *PbHP1*-occupancy through parasite development. Genes not belonging to a  
833 multigene family are highlighted with a darker colour.

834 (B) Heatmap of euchromatic traits (H3K9ac-ChIP/input) of heterochromatic genes with at least 10  
835 FPKM (fragments per kilobase of transcript per million mapped reads) for the developmental stage  
836 shown. H3K9ac enrichment for each gene locus is shown as  $\log_2$  transformed H3K9ac ChIP/input  
837 (1000bp upstream of ATG the ORF, and 500bp downstream of stop codon, respectively). Pink colour  
838 indicates mean relative transcripts (in FPKM), and the highest transcript(s) for each life cycle  
839 stage is/are named. Higher transcript numbers do not always correlate with H3K9ac occupancy within  
840 1000bp upstream of the start codon. A list of all genes is found in Table S1.

841 (C) *PbANKA\_0300600*, an exported protein of unknown function located at the heterochromatic  
842 boundary shows both heterochromatic and euchromatic traits and is transcribed in all four life cycle  
843 stages.

844 (D) *PbANKA\_1300500*, the tubulin epsilon chain is both heterochromatic and euchromatic in  
845 gametocytes, and is most transcribed in male gametocytes.

846 (E) Four genes within the heterochromatic region at the right arm of chromosome 7 display  
847 euchromatic traits correlating with transcription. Relative transcripts (in FPKM) for each gene are  
848 shown in numbers above ChIP-seq tracks.

849 Black boxes show gene of interest, white boxes indicate neighbouring genes and arrows indicate  
850 the transcriptional orientation for each gene. Peaks correspond to  $\log_2$ -transformed data of *PbHP1*-  
851 ChIP/input (-3 to 3) and H3K9ac-ChIP/input (-2 to 2).

852 ABS, asexual blood stages; FG, female gametocytes; MG, male gametocytes; OOK, ookinetes; pg,  
853 pseudogenes.



854

855 **Figure 3. 5' UTRs of ribosomal protein genes display a distinctive H3K9ac pattern.**

856 (A) Heat map of H3K9ac distribution in malaria parasite development. Genes at each stage are  
857 sorted according to their relative transcription levels, with highly expressed genes on top.  
858 Arrowheads indicate a shift of H3K9ac occupancy towards the start codon. H3K9ac enrichment for  
859 each gene locus is shown as log<sub>2</sub>-transformed H3K9ac ChIP/input (1000bp upstream of ATG the  
860 ORF, and 500bp downstream of stop codon, respectively).

861 (B) Scatterplot showing mean H3K9ac occupancy of 5' UTRs (1000bp) against transcriptional  
862 strength (mean FPKM) for each gene for each developmental stage. Spearman's rank correlation  
863 coefficient for each scatterplot is shown (r). Genes belonging to a multigene family are highlighted  
864 in yellow.

865 (C) Heat map of H3K9ac enrichment for all 74 ribosomal protein genes (40S and 60S). H3K9ac is  
866 enriched in a sharp peak around the start codon in ABS, FG and OOK, but less in MG.

867 (D) Summary plot of the data shown in C. The mean of H3K9ac enrichment of ribosomal protein  
868 genes is shown as a bold line for each life cycle stage, standard error is shown in lighter colours.

869 (E) Boxplots show mean H3K9ac-enrichment values for 5'UTRs (500bp) of ribosomal protein genes  
870 for each stage. Whiskers indicate the 5<sup>th</sup> and 95<sup>th</sup> percentile, respectively. Individual symbols  
871 represent outliers. Asterisks mark significance (Wilcoxon signed rank test for matched-pairs,  
872  $p \leq 0.0001$ ).

873 (F) Boxplots show mean H3K9ac-enrichment values for 3'UTR of each ribosomal protein gene.  
874 Whiskers indicate the 5<sup>th</sup> and 95<sup>th</sup> percentile, respectively. Individual symbols represent outliers.  
875 Wilcoxon signed rank test for matched-pairs found no difference between the developmental stages  
876 (ns).

877 (G) Boxplots show mean relative ribosomal gene transcripts for each life cycle stage. Asterisks mark  
878 significance (Wilcoxon signed rank test for matched-pairs,  $p \leq 0.0001$ ).

879 ABS, asexual blood stage; FG, female gametocyte; MG, male gametocyte; OOK, ookinete; ORF,  
880 open reading frame

881

882 **Figure 4. H3K9ac intensity correlates with relative transcripts in asexual blood stages, male**  
883 **gametocytes and ookinetes.**

884 (A-C) Comparative profiling of ABS, MG and OOK vs FG. Each dot represents a gene. Genes with  
885 a non-significant change in transcript abundance are shown in grey and genes that are significantly  
886 up- or downregulated are shown in their respective colour (p value adjusted for multiple testing with  
887 the Benjamini-Hochberg procedure which controls false discovery rate (FDR), here  $p < 0.001$ ).

888 (D) Mean H3K9ac distribution of in asexual blood stages correlates with transcript levels. The upper  
889 panel shows the mean H3K9ac distribution for all genes that are either up- or downregulated in ABS  
890 vs FG. The mean H3K9ac enrichment of all loci is indicated with a solid line, and the standard error  
891 is shown in a lighter colour. 1000bp upstream and 500bp downstream of each gene is included.  
892 Boxplots show mean H3K9ac enrichment for the 5' UTR for both gene groups. In ABS, (compared  
893 to FG), mean H3K9ac enrichment in the 5'UTR of a gene positively correlates with its transcript  
894 levels (Mann Whitney test,  $p < 0.0001$ ). Boxes extend from the 25th to 75th percentiles, and the  
895 median is shown as a line in the middle of the box and as a number below the boxes. Whiskers  
896 indicate the 5<sup>th</sup> and 95<sup>th</sup> percentile, respectively. Individual symbols represent outliers. The median  
897 is shown.

898 (E) In male gametocytes (compared to FG), mean H3K9ac enrichment in the 5'UTR of a gene  
899 positively correlates with its transcript levels (Mann Whitney test,  $p < 0.0001$ ). Labelling is the same  
900 as in D.



- 901 (F) In ookinetes (compared to FG), mean H3K9ac enrichment in the 5'UTR of a gene positively  
902 correlates with its transcript levels (Mann Whitney test,  $p < 0.0001$ ). Labelling is the same as in D.
- 903 (G) Mean H3K9ac distribution of in female gametocytes using the same gene groups as in A and D.  
904 Genes that are upregulated in FG (compared to ABS) are less enriched for H3K9ac in their 5'UTR  
905 of than downregulated genes in FG (Mann Whitney test,  $p = 0.0016$ ).
- 906 (H) Mean H3K9ac distribution of in female gametocytes using the same gene groups as in B and E.  
907 Genes that are upregulated in FG (compared to MG) are less enriched for H3K9ac in their 5'UTR of  
908 than downregulated genes in FG (Mann Whitney test,  $p = 0.0024$ ).
- 909 (J) Mean H3K9ac distribution of in female gametocytes using the same gene groups as in C and F.  
910 Genes that are upregulated and downregulated in FG (compared to OOK) show the same H3K9ac  
911 enrichment in FG (Mann Whitney test, non-significant (ns),  $p = 0.57$ ).

912

913 **Figure 5. H3K9ac enrichment in the 5'UTR of a gene does not positively correlate with its**  
914 **relative transcripts in female gametocytes.**

- 915 (A) Venn diagram of all genes that are significantly up- or downregulated in female gametocytes  
916 compared to asexual blood stages, male gametocytes and ookinetes, respectively.
- 917 (B) Enriched GO-terms (slim) of both up- and downregulated genes in female gametocytes  
918 compared to all other life cycle stages. Each respective p-value is indicated. The full list of genes  
919 and GO-terms can be found in Supplementary Table 3.
- 920 (C) H3K9ac enrichment in female gametocytes for female-specific genes. The left panel shows  
921 H3K9ac enrichment in female gametocytes for genes that are significantly up- or downregulated in  
922 female gametocytes only. The mean H3K9ac enrichment of all loci is indicated with a solid line, and  
923 the standard error is shown in a lighter colour. 1000bp upstream and 500bp downstream of each  
924 gene is included. Boxplots show mean H3K9ac enrichment for the 5' UTR for both gene groups.  
925 Mean H3K9ac enrichment in the 5'UTR of a gene negatively correlates with its transcript levels  
926 (Mann-Whitney test,  $p\text{-value} = 0.0009$ ). Boxes extend from the 25th to 75th percentiles, and the  
927 median is shown as a line in the middle of the box. Whiskers indicate 5 and 95 percentiles,  
928 respectively, and outliers are individual dots. The median is shown.

929

930 **Figure 6: Novel and known DNA-binding motifs enriched in the 5' UTR of ookinete-specific**  
931 **genes.**

- 932 (A) Venn diagram of genes that are significantly up regulated in ookinetes vs female gametocytes  
933 and their overlap with AP2-O genes from Kaneko et al (23). DNA motifs significantly enriched in in  
934 the 5' UTR of all significantly upregulated ookinete genes compared to the 5' UTR of all genes. The  
935 number of genes exhibiting each motif is shown as well as the E-value for each motif. The AP2-O  
936 motif is highly enriched.
- 937 (B) Venn diagram of genes that are at least 8-fold significantly up regulated in ookinetes vs female  
938 gametocytes and their overlap with AP2-O genes from Kaneko et al (23) DNA motifs significantly  
939 enriched in the 5' UTR of 8-fold upregulated ookinete genes compared to the 5' UTR of all genes.  
940 The number of genes exhibiting each motif is shown as well as the E-value for each motif. The AP2-  
941 O motif is highly enriched.

942

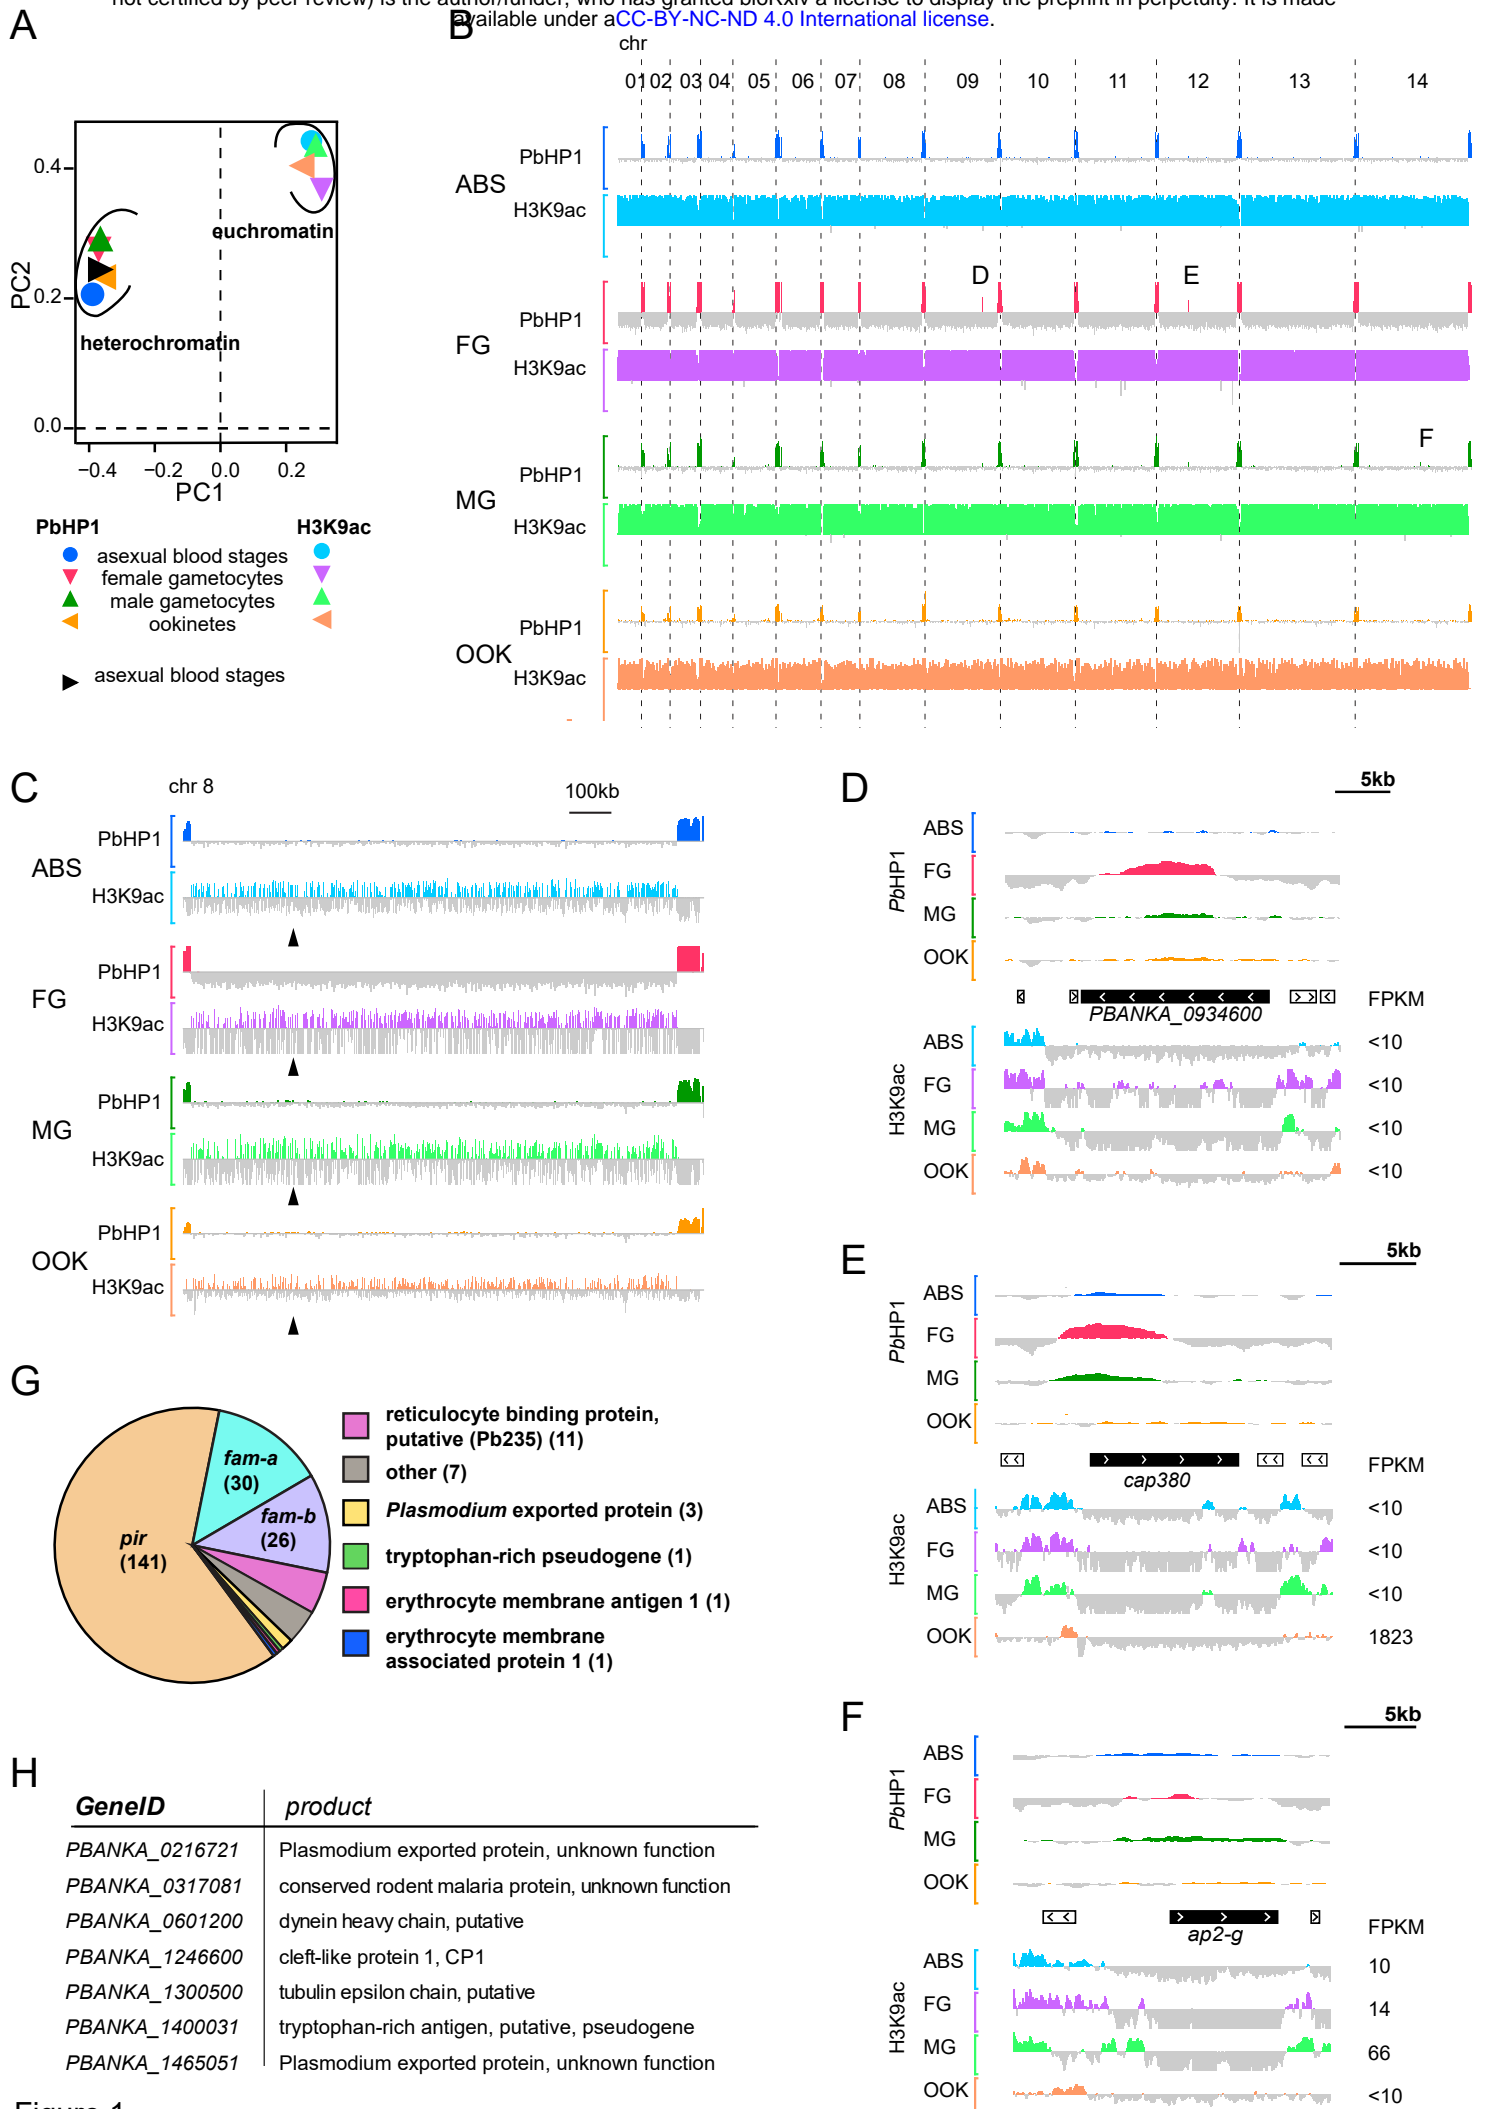

Figure 1

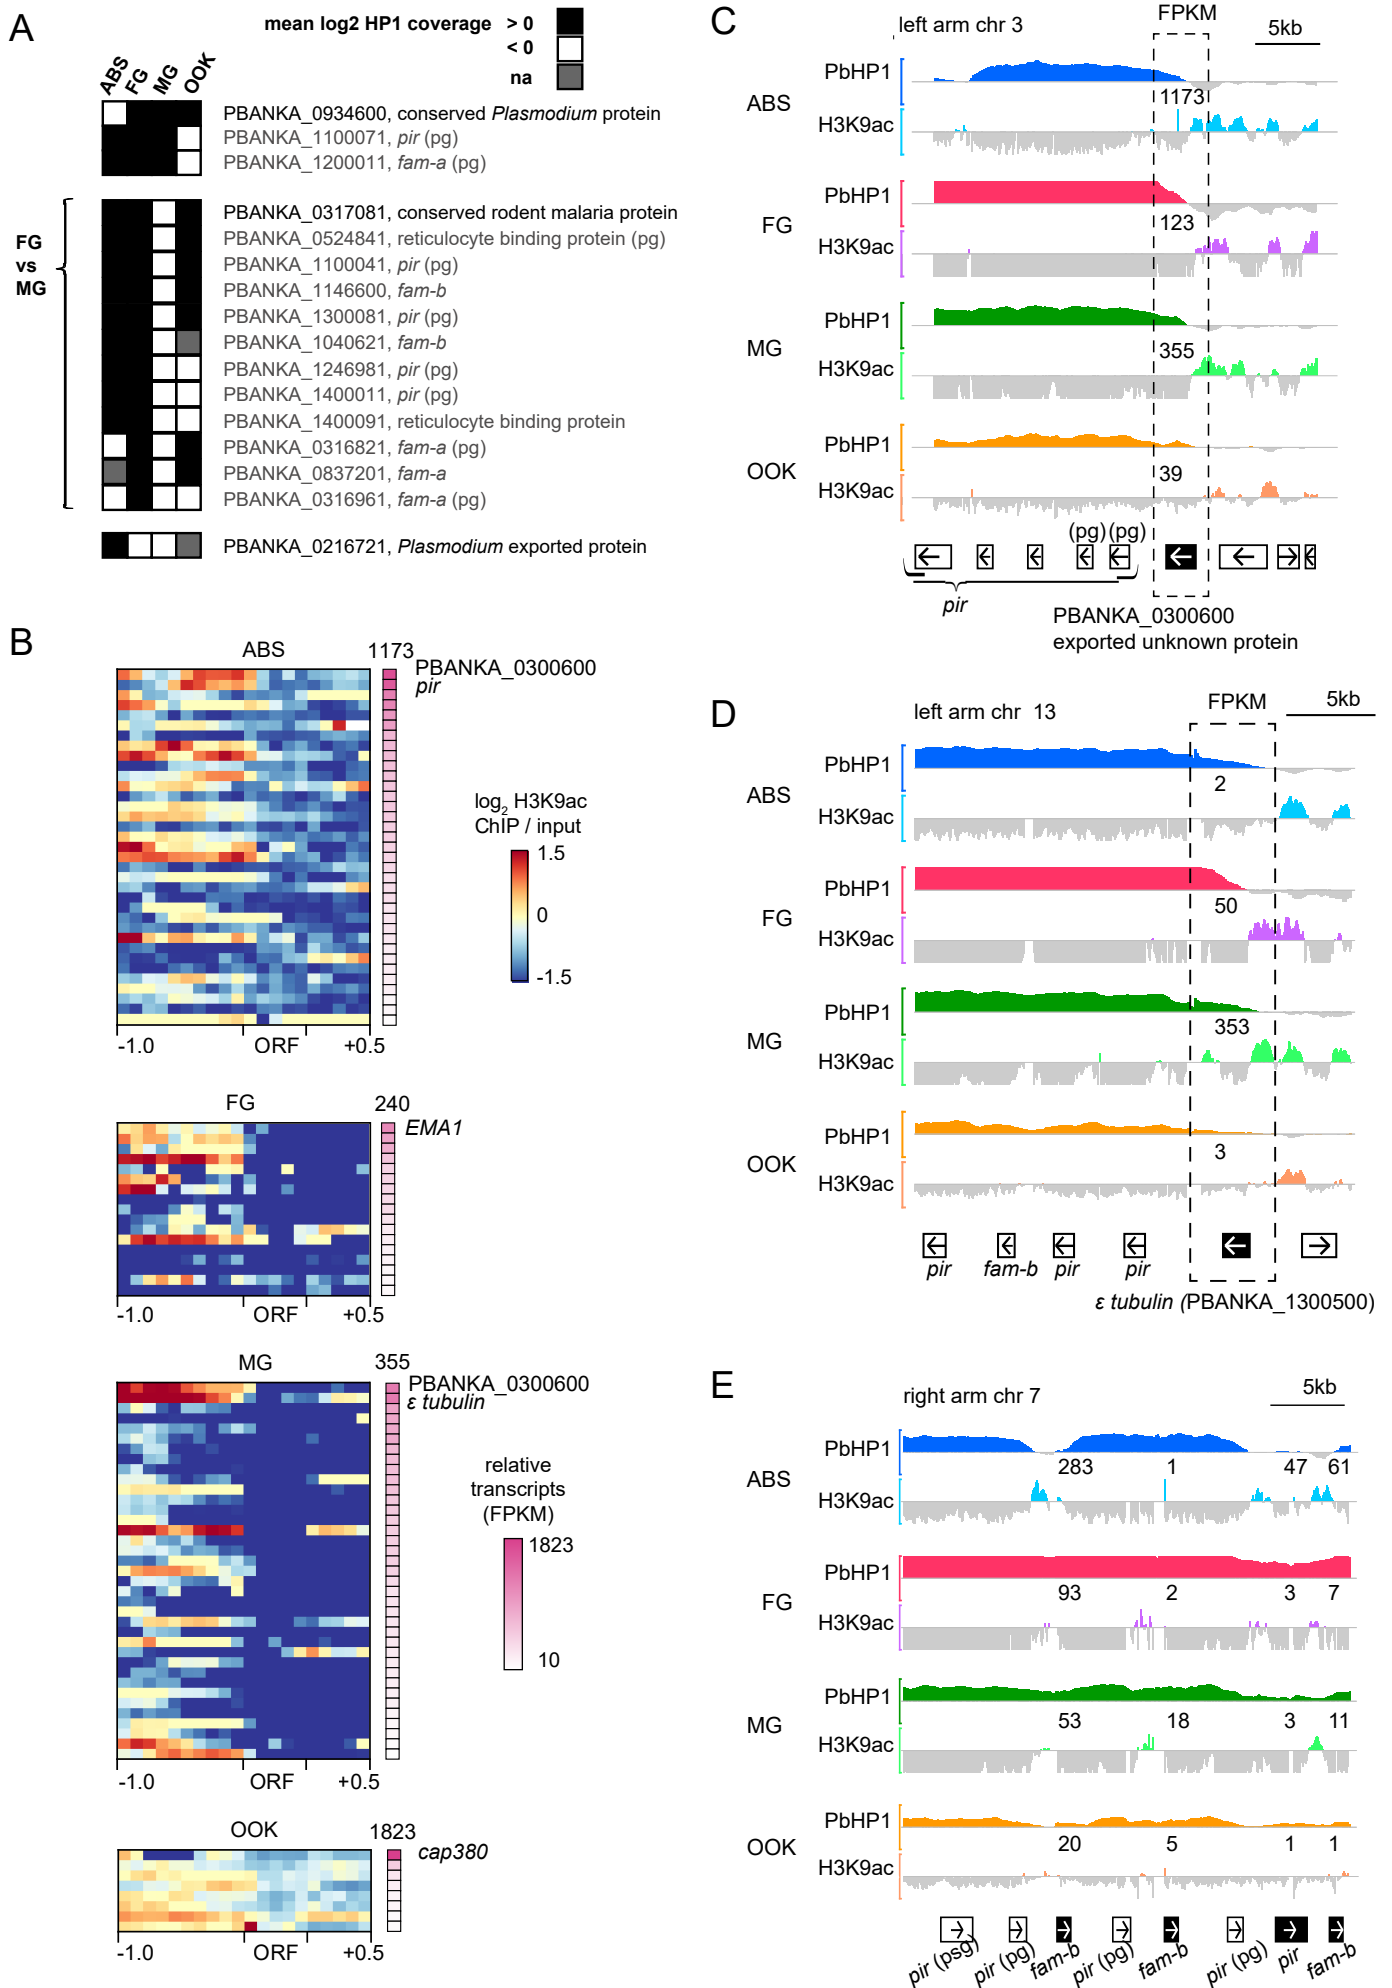

Figure 2

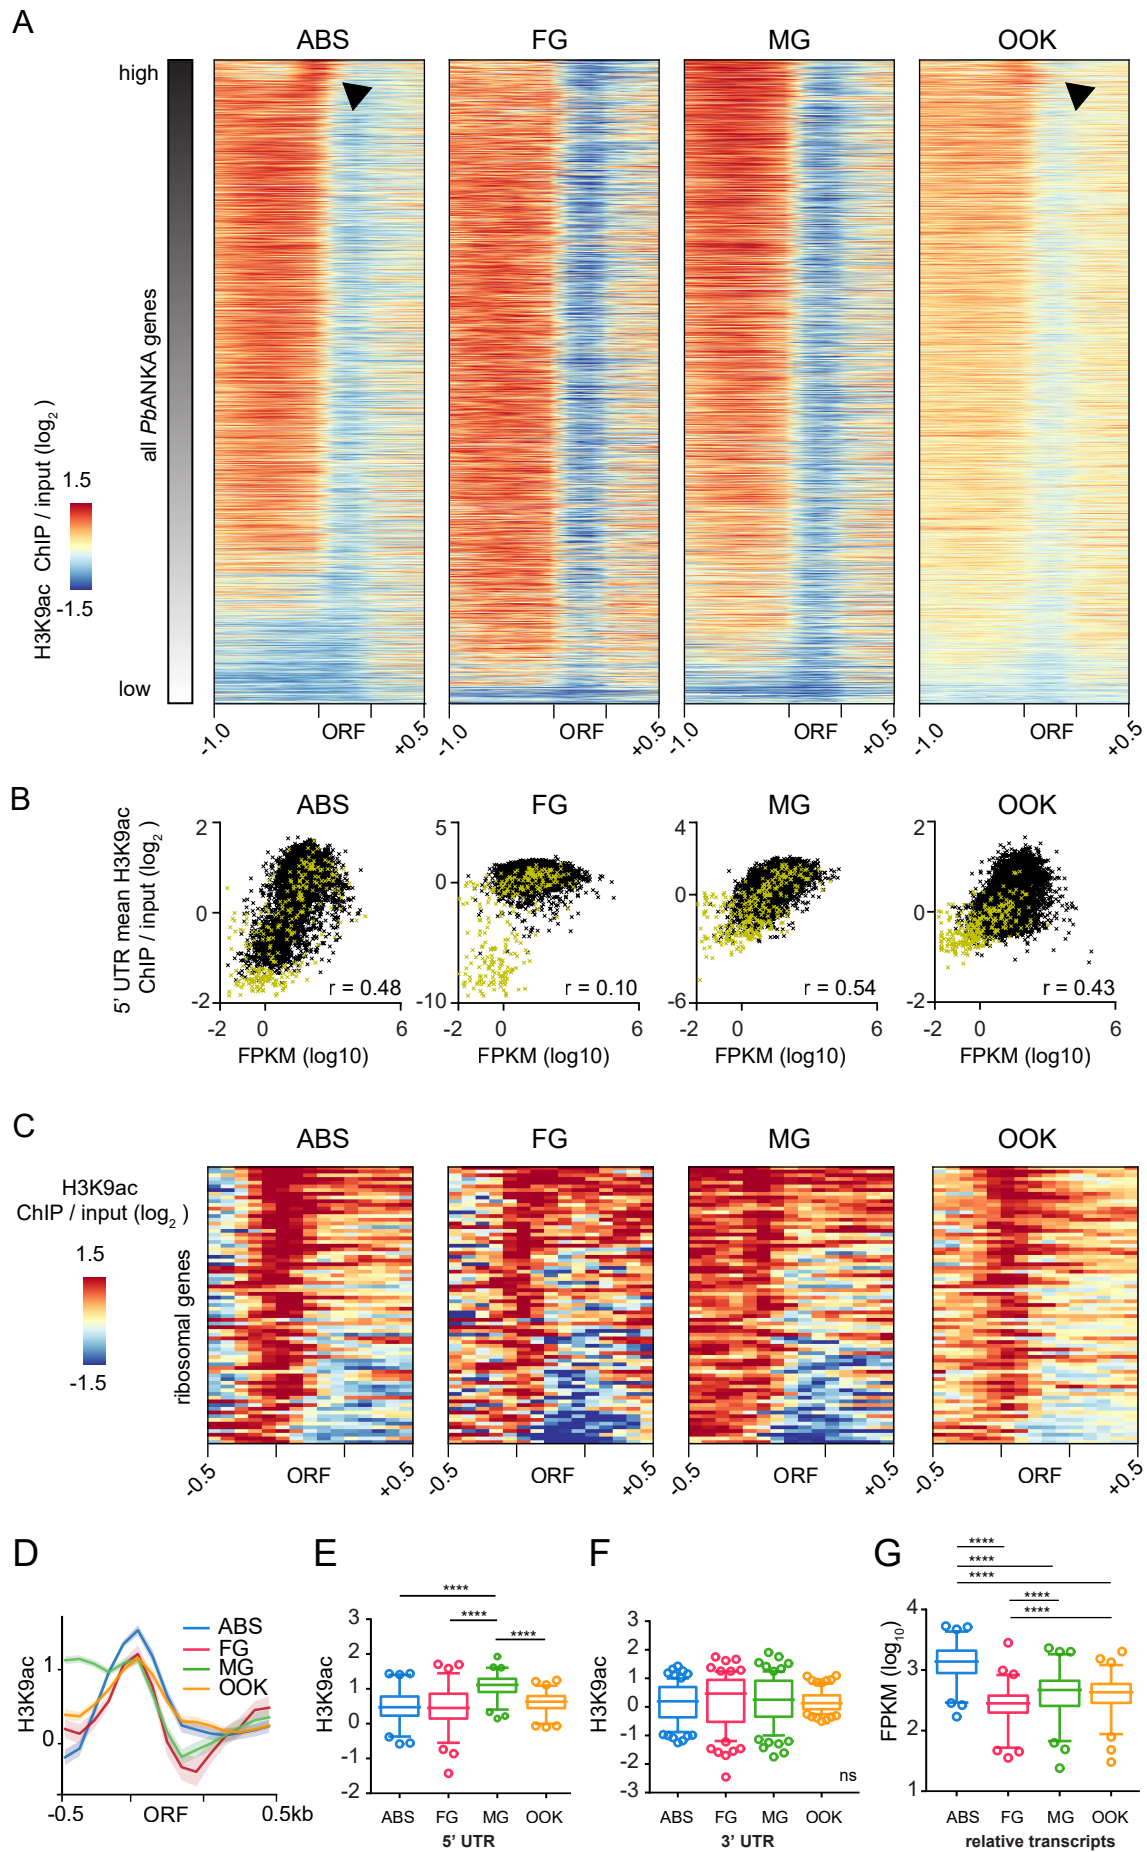

Figure 3

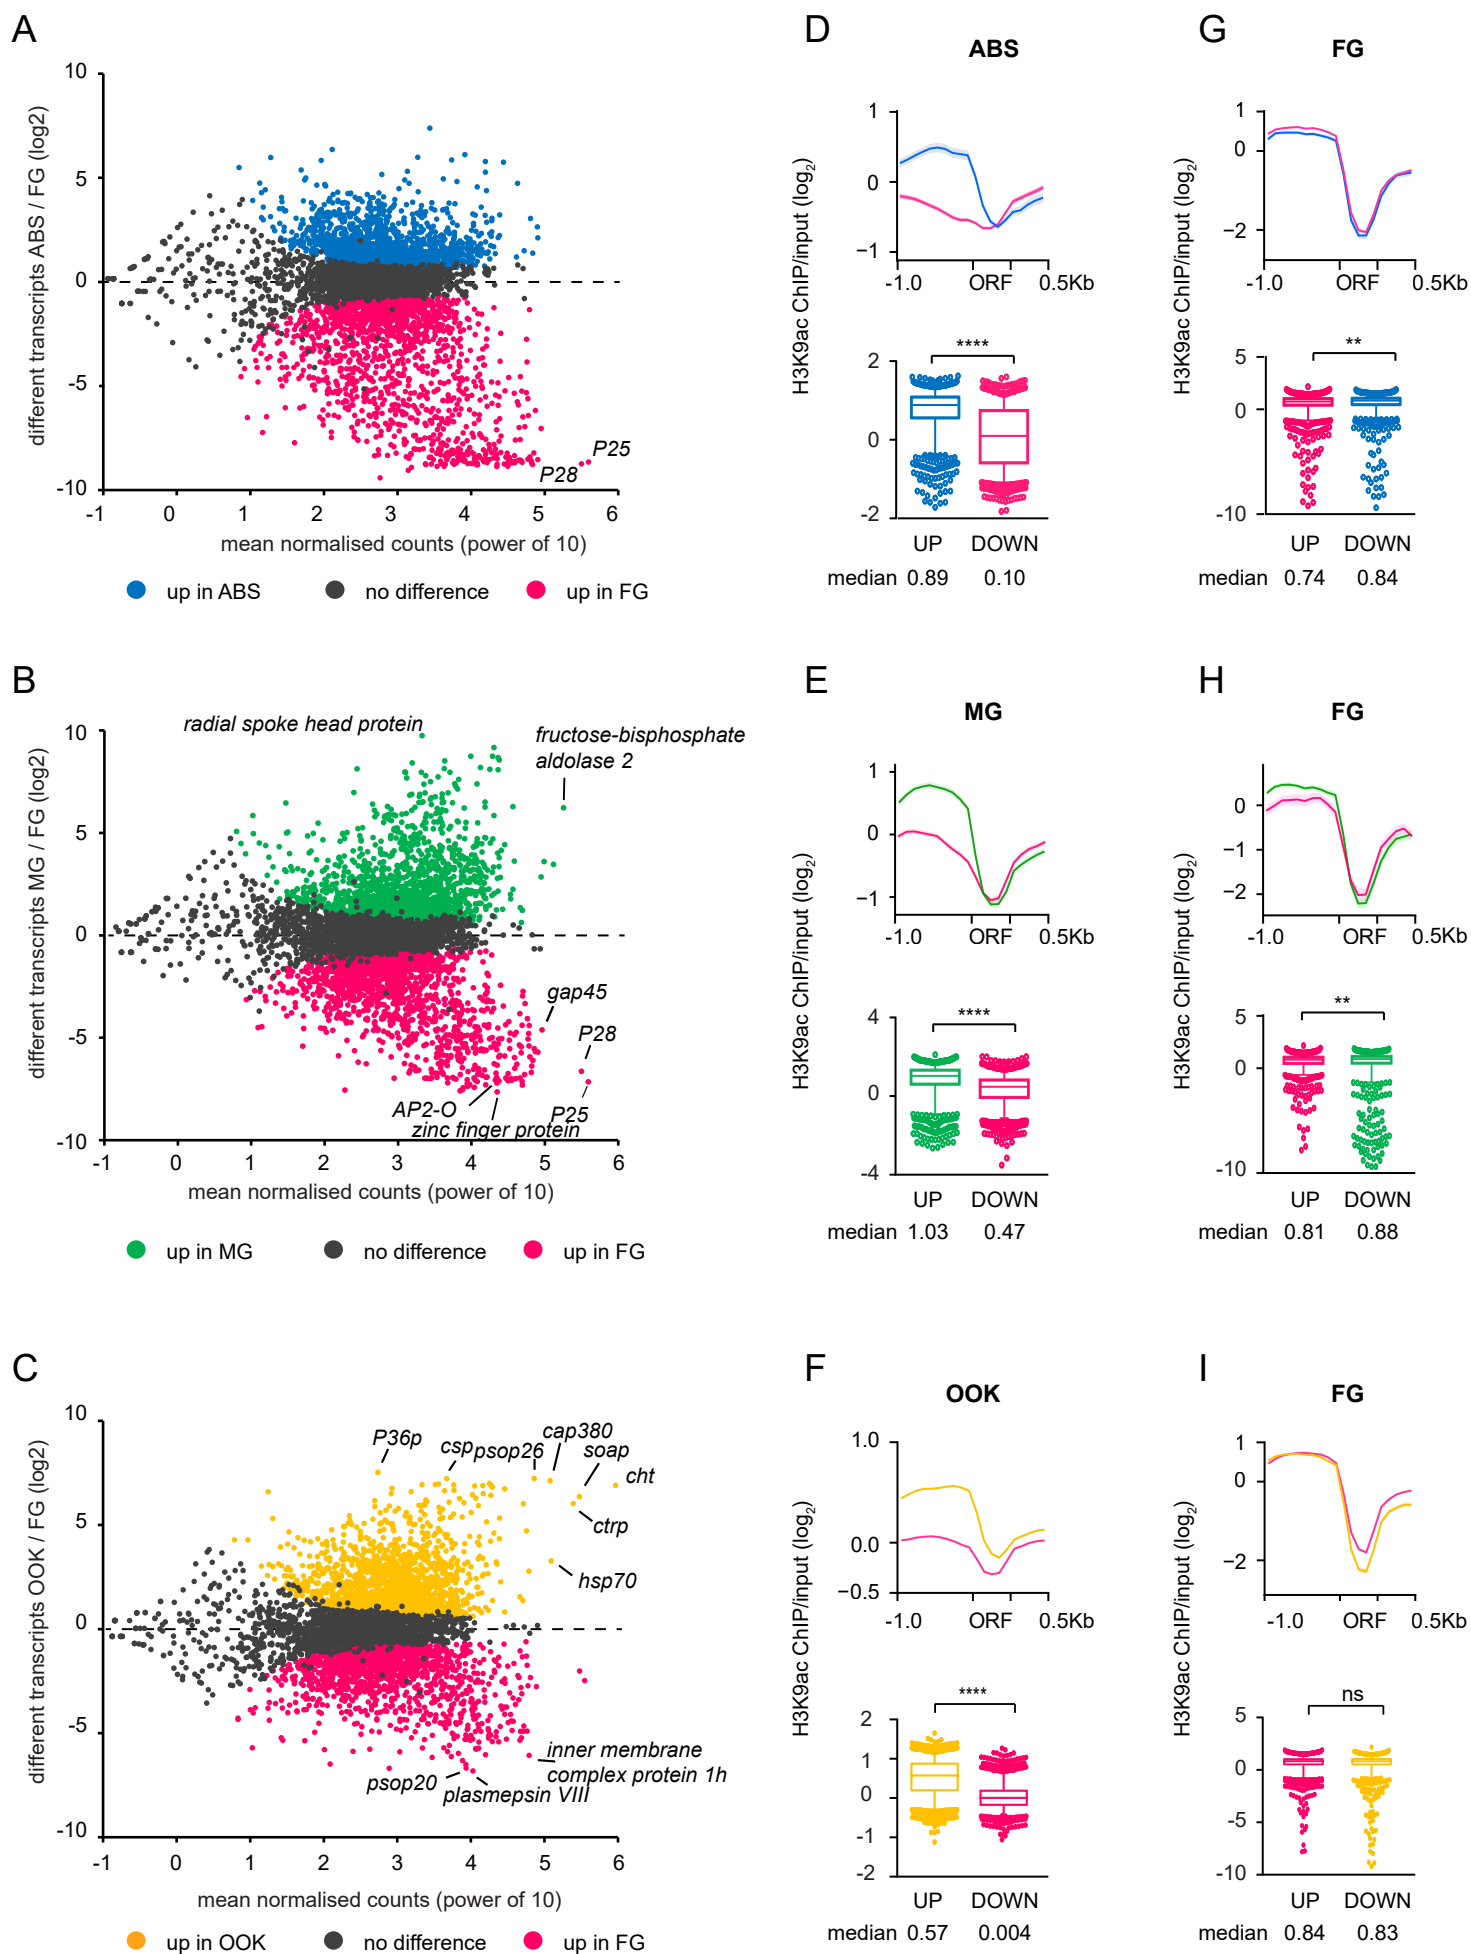

Figure 4



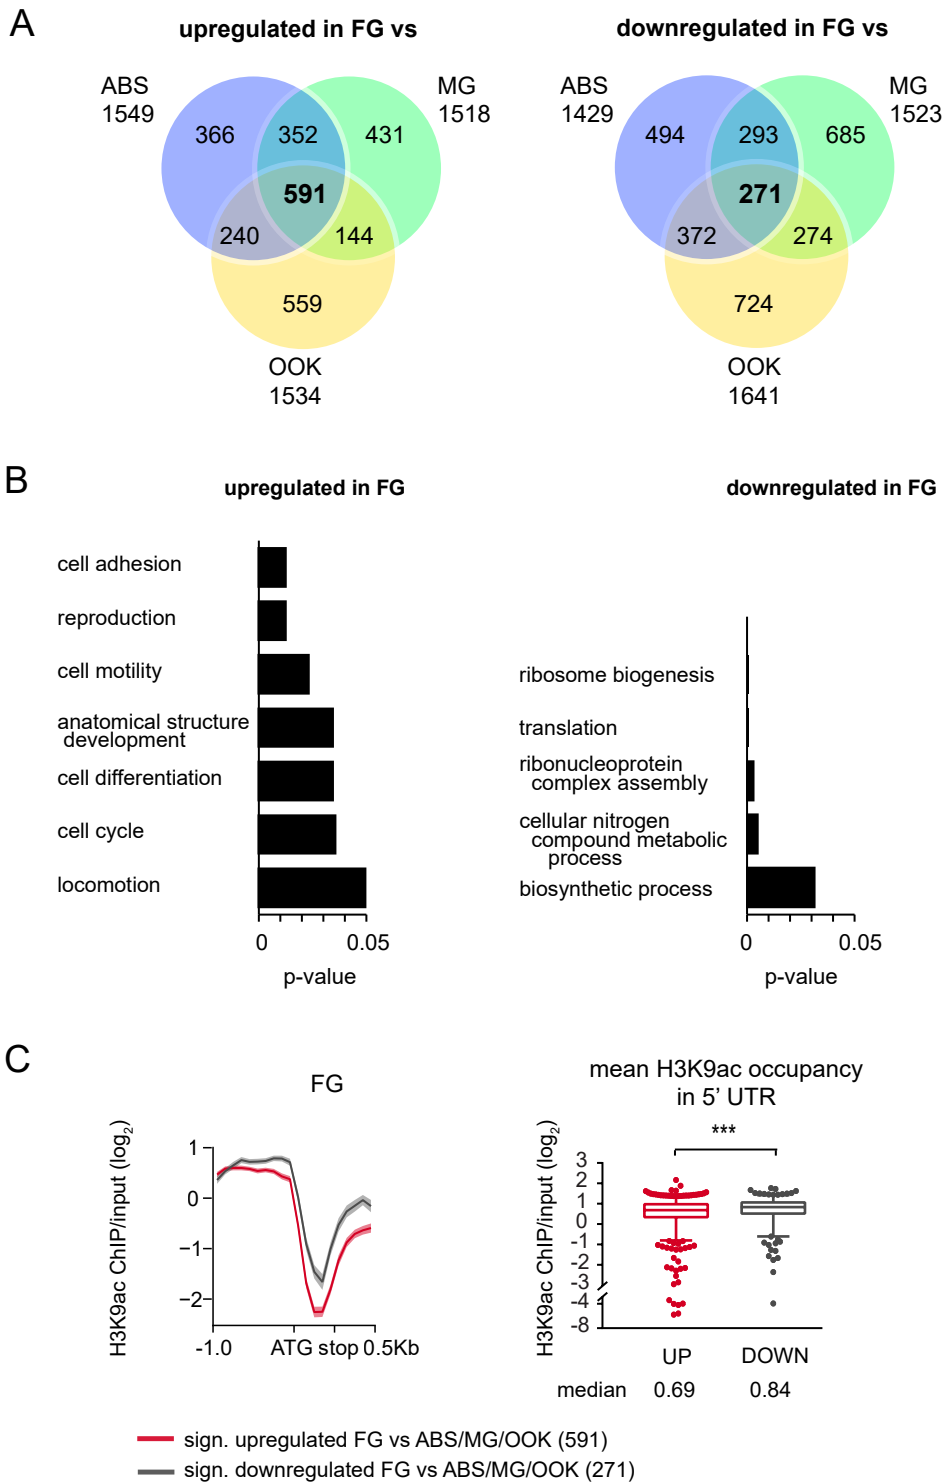

Figure 5

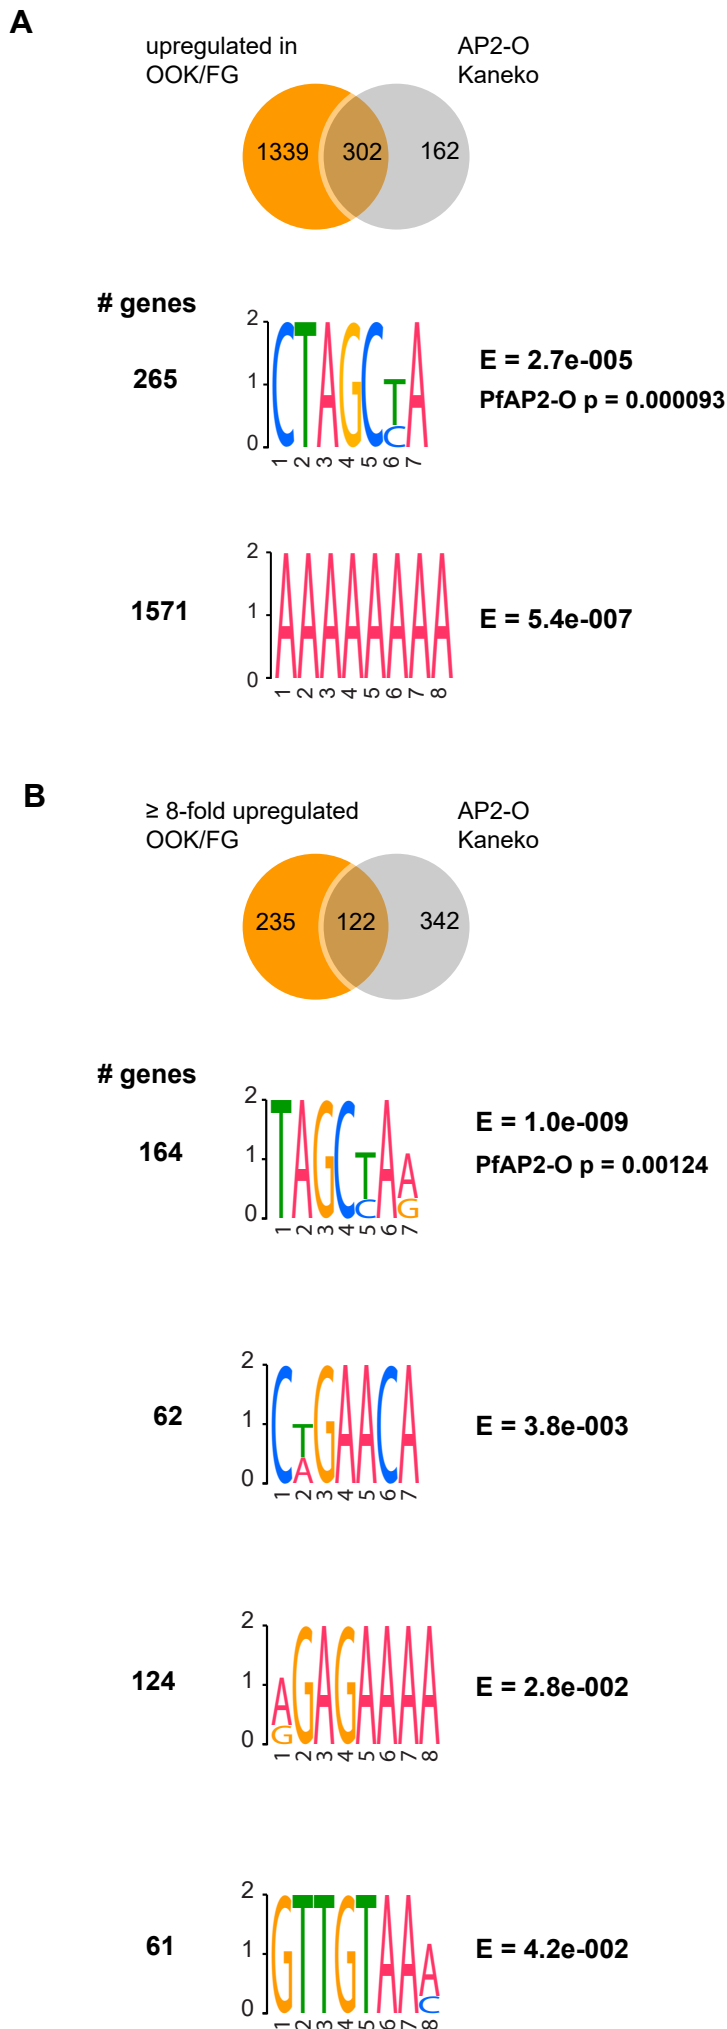

Figure 6
